# Supplementary material
Source: ML conference proceedings conference paper supplement (https://openreview.net/forum?id=FAeU7516MR)

$K = 1, \rho = 1/64, \gamma = 2$ 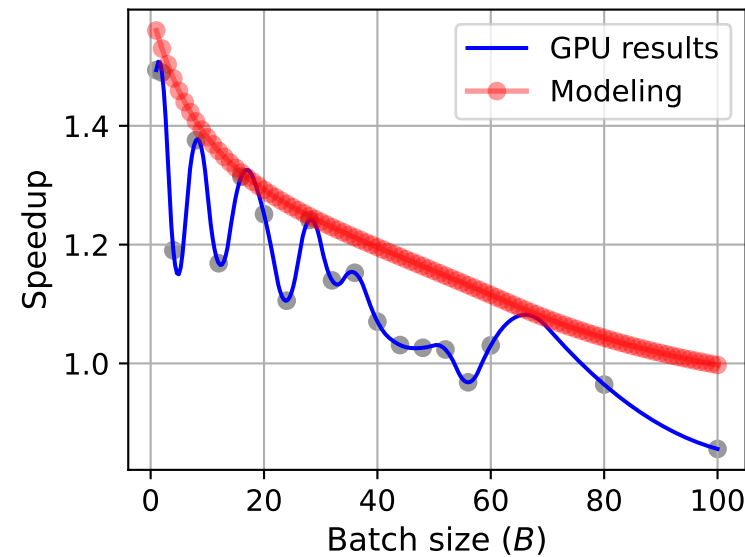 $K = 2, \rho = 2/64, \gamma = 2$ 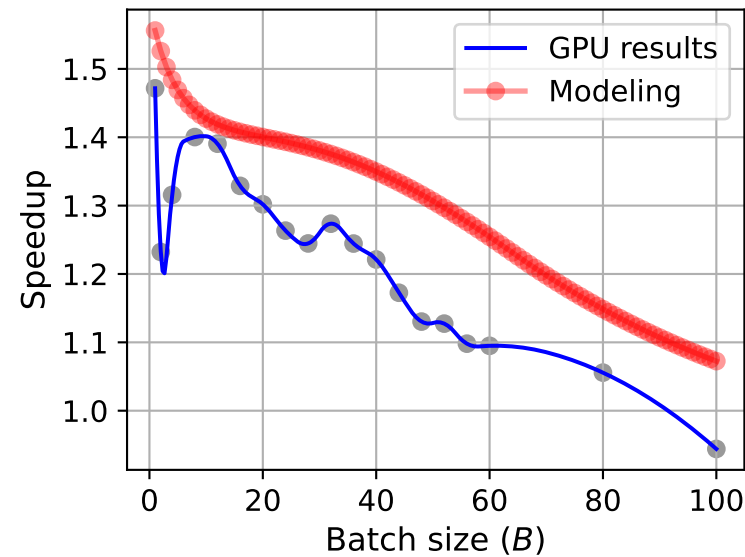 $K = 1, \rho = 1/64, \gamma = 4$ 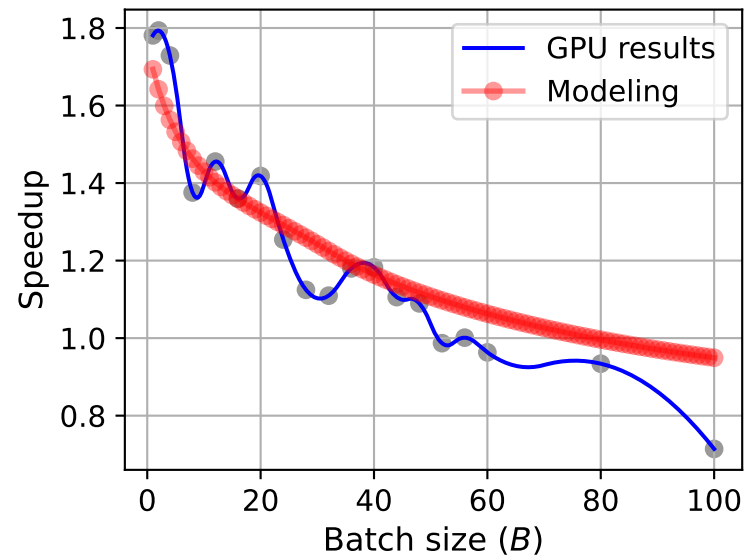 $K = 2, \rho = 2/64, \gamma = 4$ 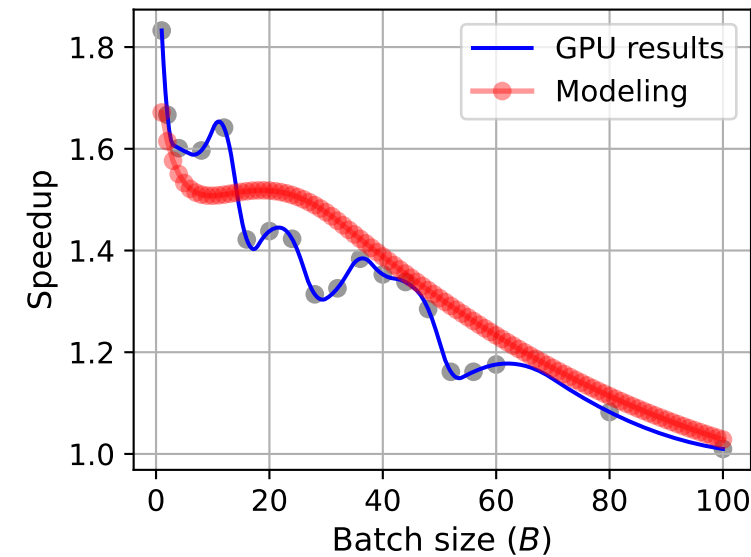 $K = 4, \rho = 4/64, \gamma = 2$ 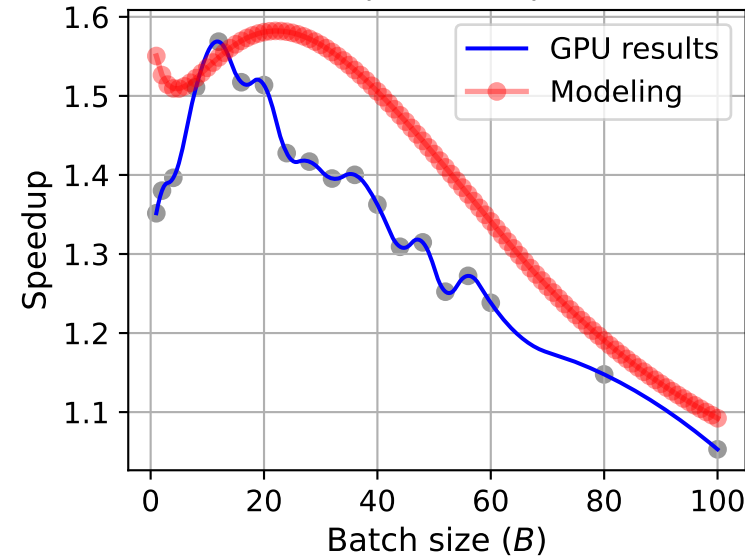 $K = 8, \rho = 8/64, \gamma = 2$ 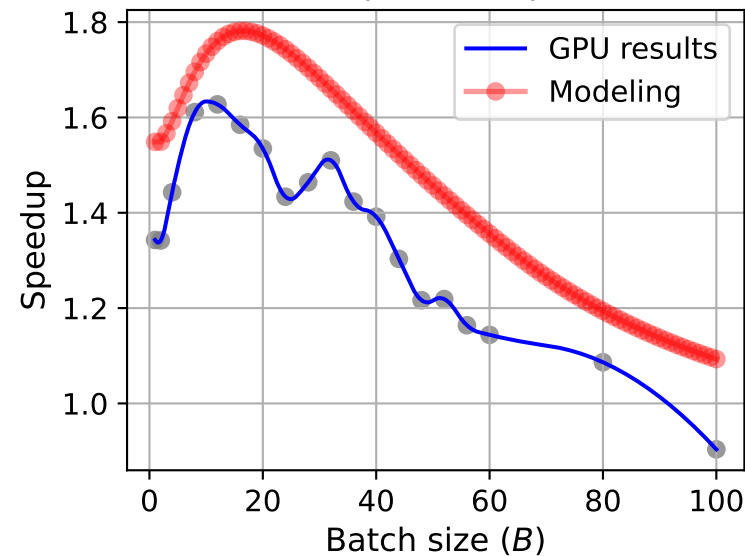 $K = 4, \rho = 4/64, \gamma = 4$ 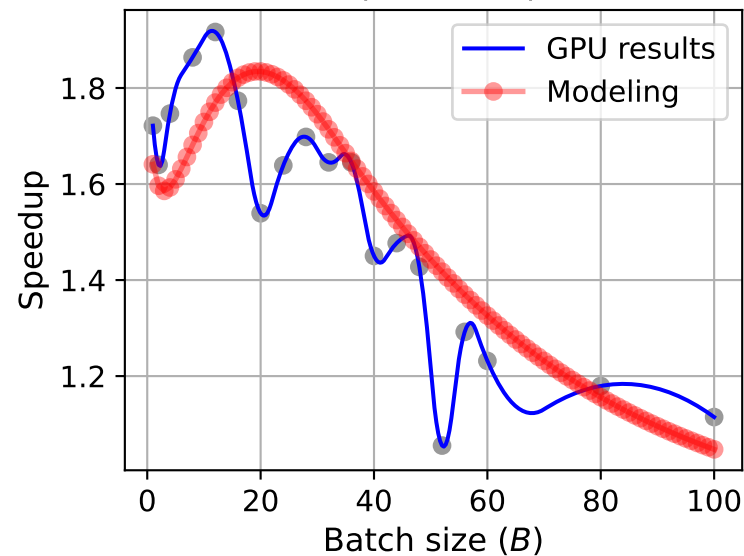 $K = 8, \rho = 8/64, \gamma = 4$ 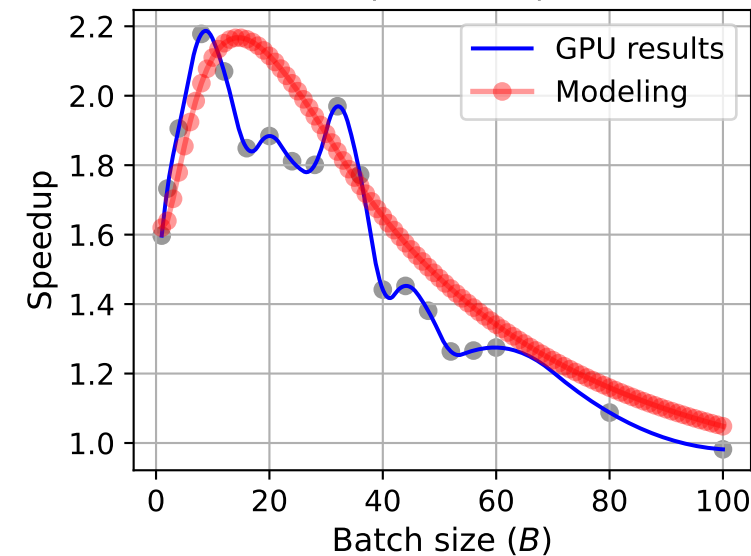 $K = 16, \rho = 16/64, \gamma = 2$ 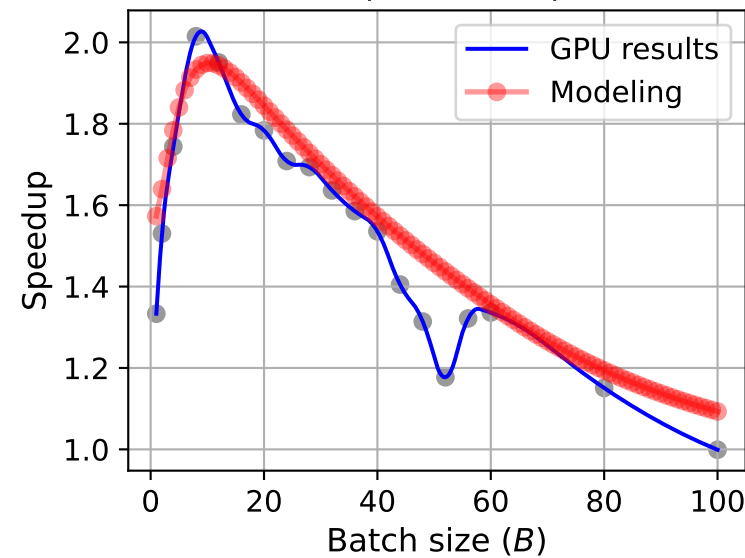 $K = 32, \rho = 32/64, \gamma = 2$ 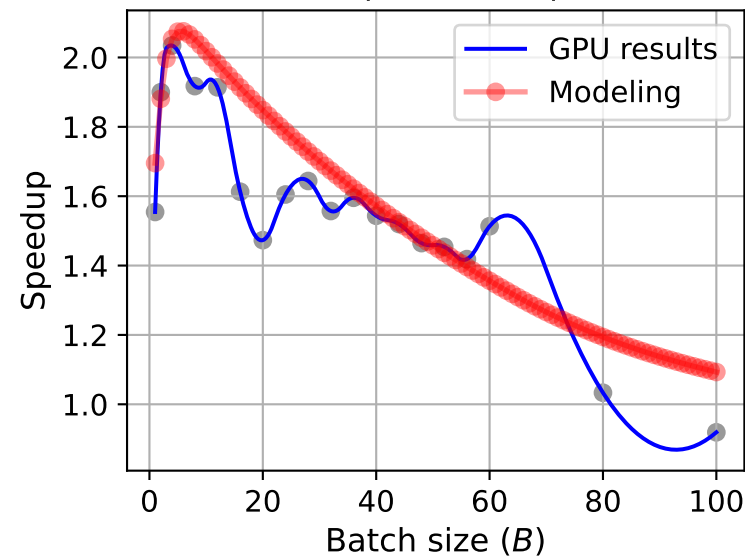 $K = 16, \rho = 16/64, \gamma = 4$ 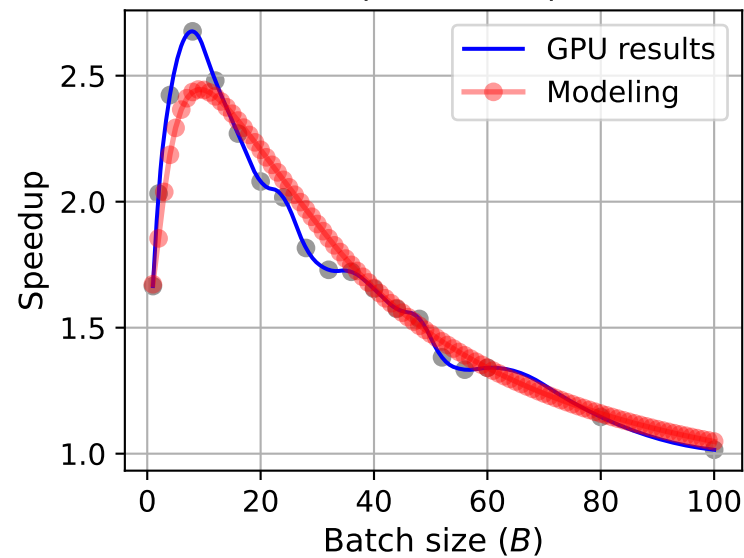 $K = 32, \rho = 32/64, \gamma = 4$ 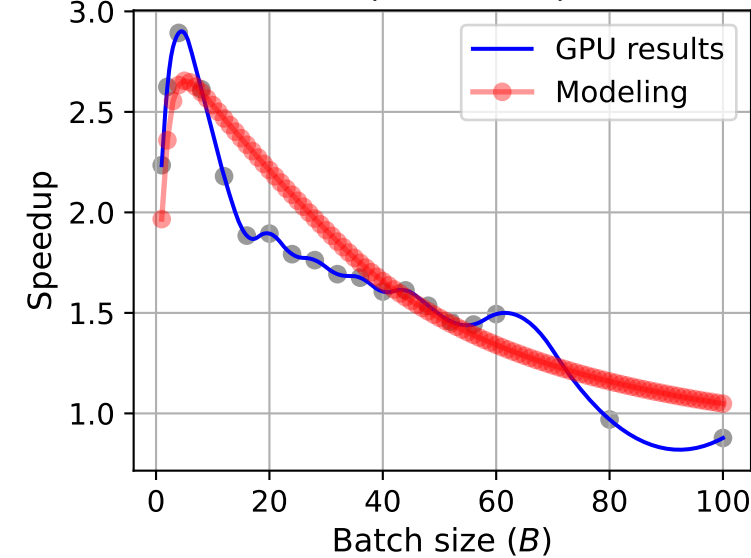

Supplement: supplementary_material [file fit_10_measurements.pdf › code/modeling/plot_example/appendix/fit_10_measurements.pdf]
