# Supplementary material
Source: ML conference proceedings conference paper supplement (https://openreview.net/forum?id=FAeU7516MR)

K=1,  $\rho=1/64$ ,  $\gamma=2$ 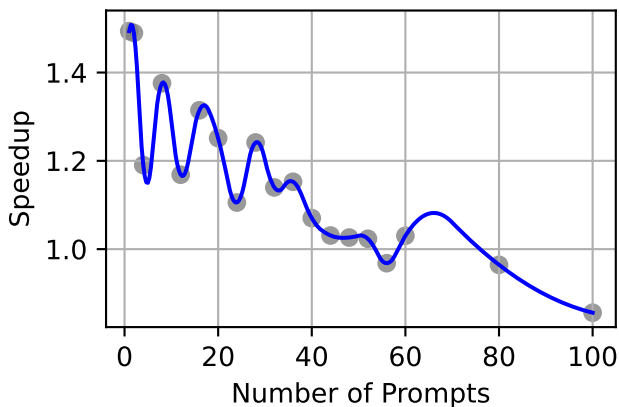K=1,  $\rho=1/64$ ,  $\gamma=4$ 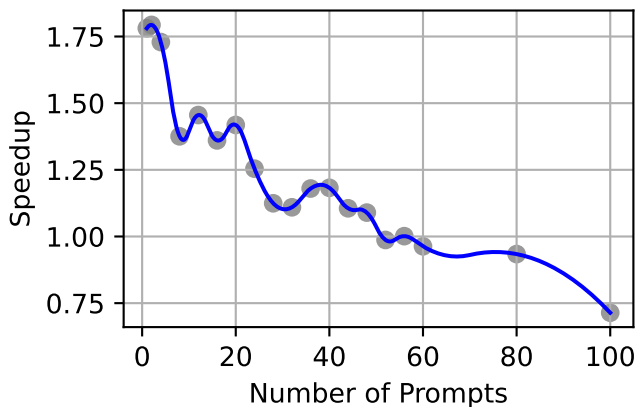K=2,  $\rho=2/64$ ,  $\gamma=2$ 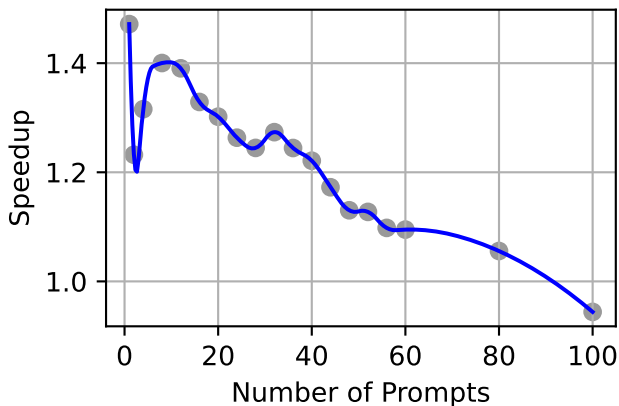K=2,  $\rho=2/64$ ,  $\gamma=4$ 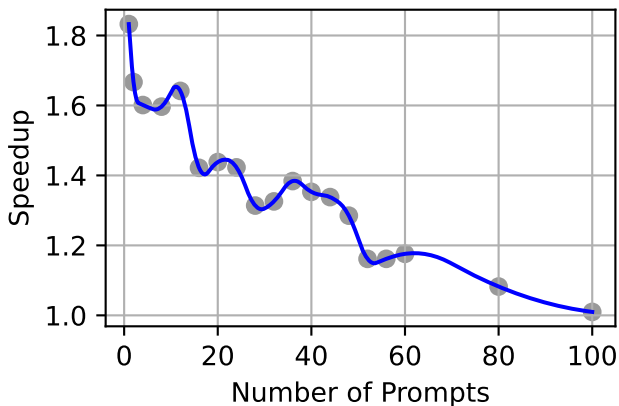K=4,  $\rho=4/64$ ,  $\gamma=2$ 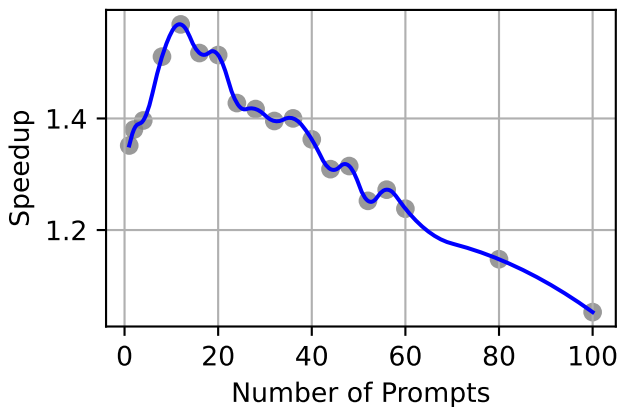K=4,  $\rho=4/64$ ,  $\gamma=4$ 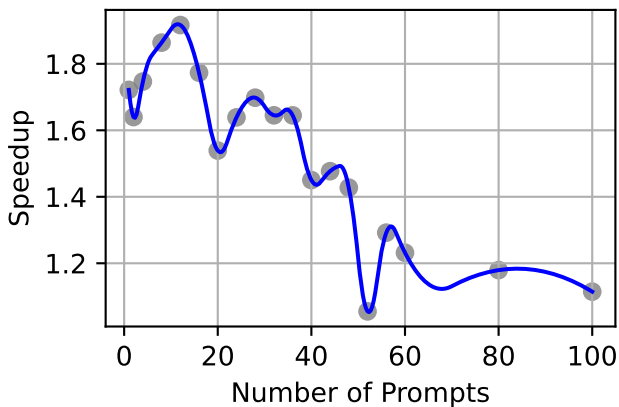K=8,  $\rho=8/64$ ,  $\gamma=2$ 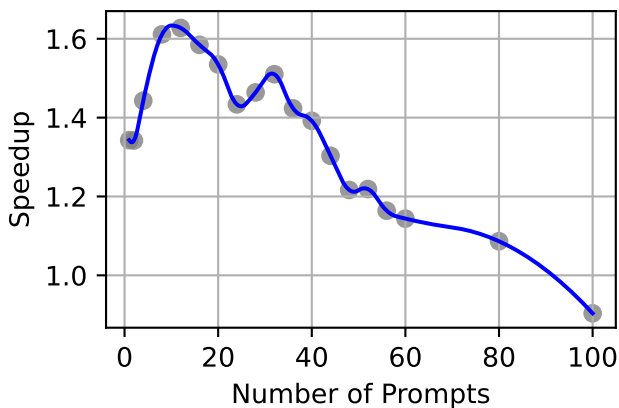K=8,  $\rho=8/64$ ,  $\gamma=4$ 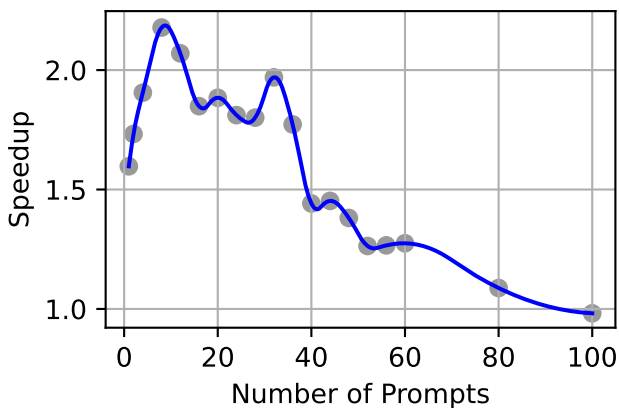K=16,  $\rho=16/64$ ,  $\gamma=2$ 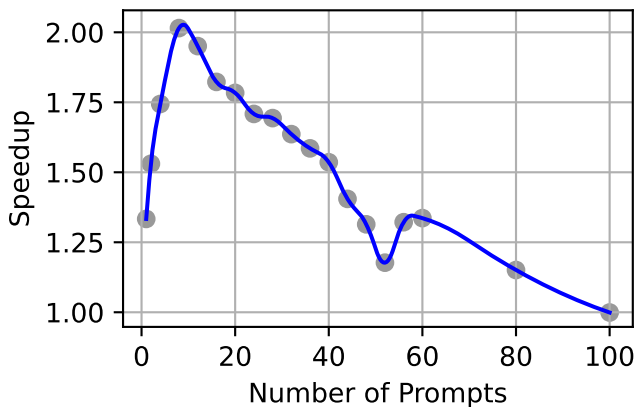K=16,  $\rho=16/64$ ,  $\gamma=4$ 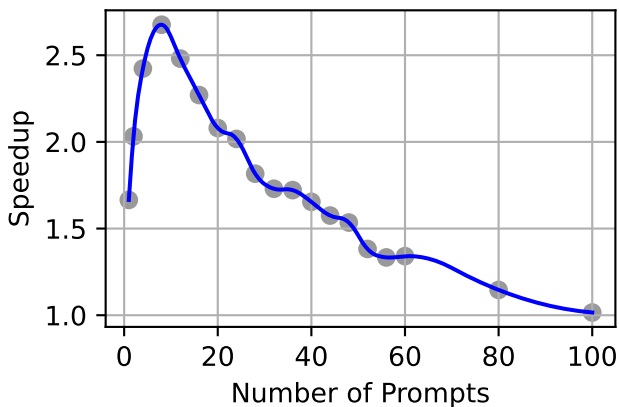K=32,  $\rho=32/64$ ,  $\gamma=2$ 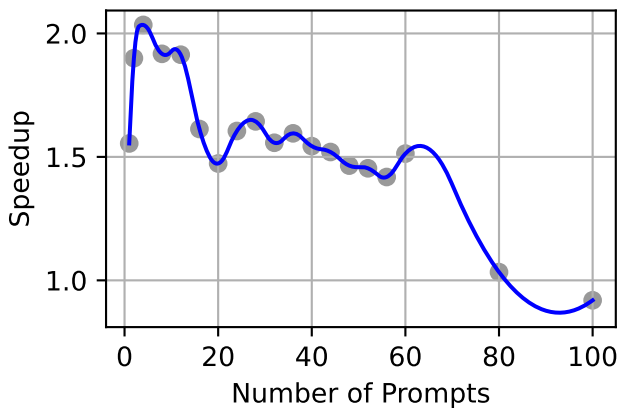K=32,  $\rho=32/64$ ,  $\gamma=4$ 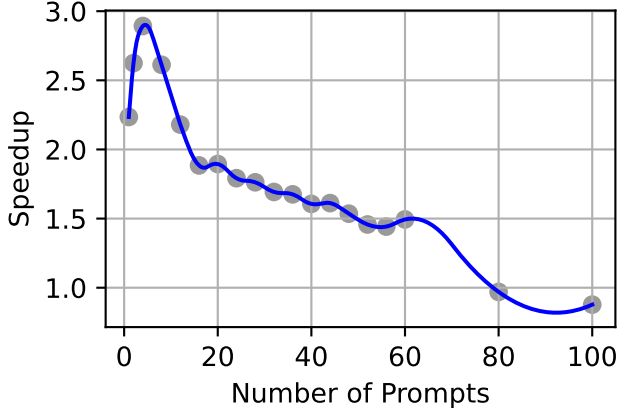

Supplement: supplementary_material [file speedup_for_varied_sparsity.pdf › code/sparsity/plot_example/speedup_for_varied_sparsity.pdf]
