# Supplementary material
Source: ML conference proceedings conference paper supplement (https://openreview.net/forum?id=FAeU7516MR)

humaneval, temp=0,  $\gamma = 4$

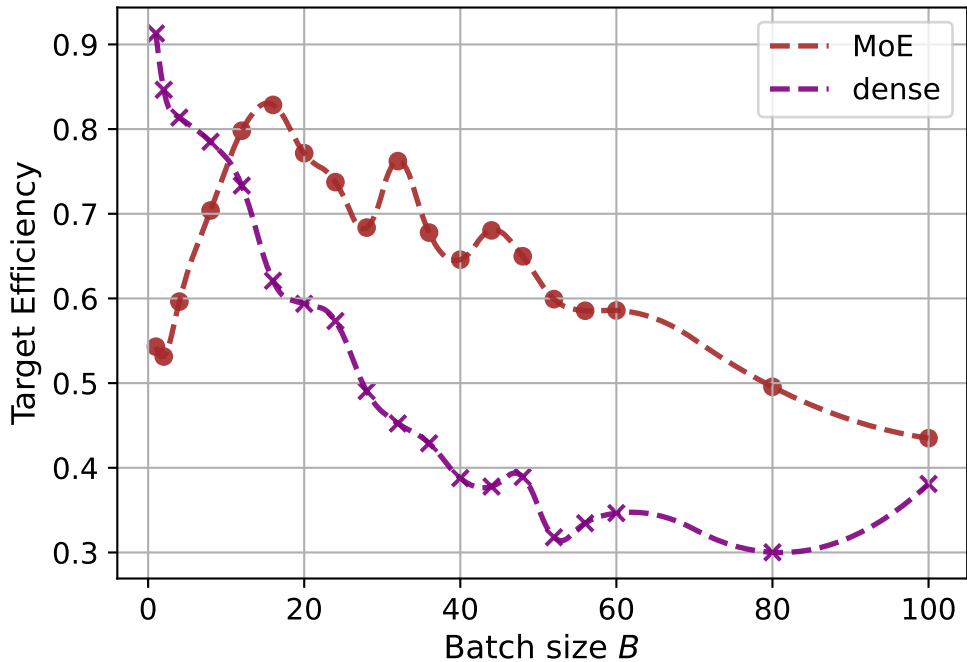

Supplement: supplementary_material [file metric_moe_vs_dense.pdf › code/dense/plot_example/metric_moe_vs_dense.pdf]

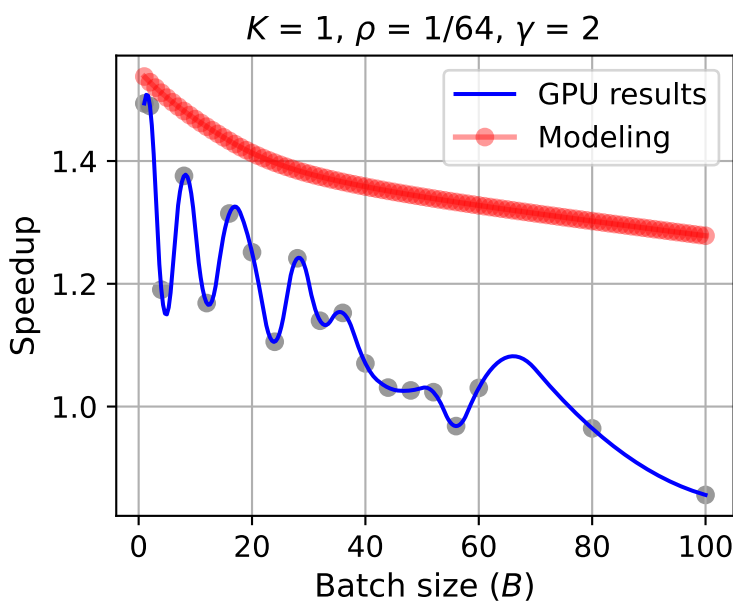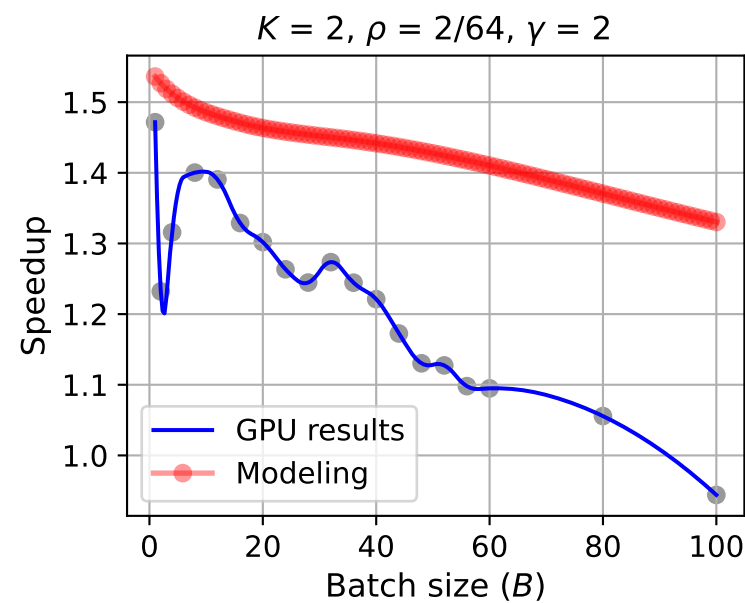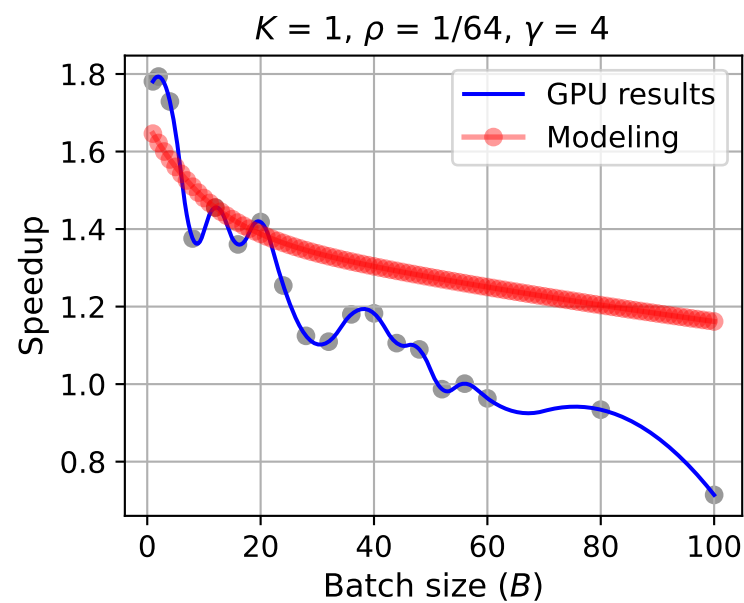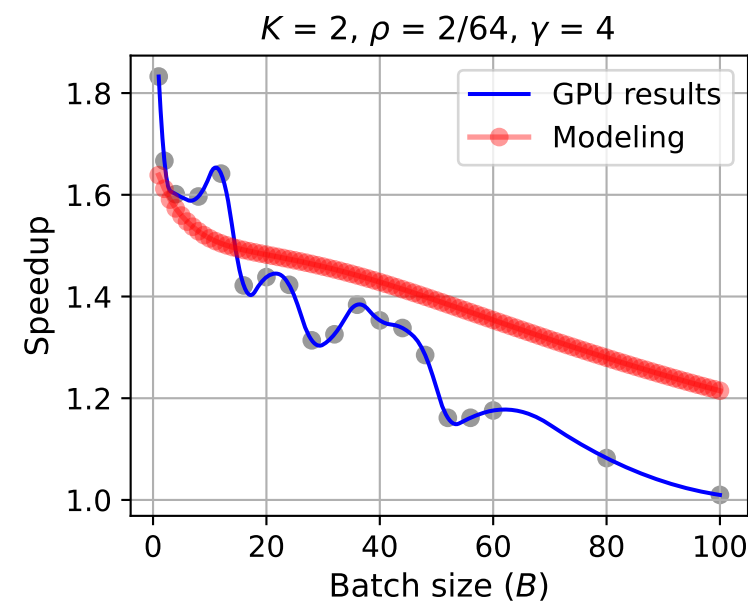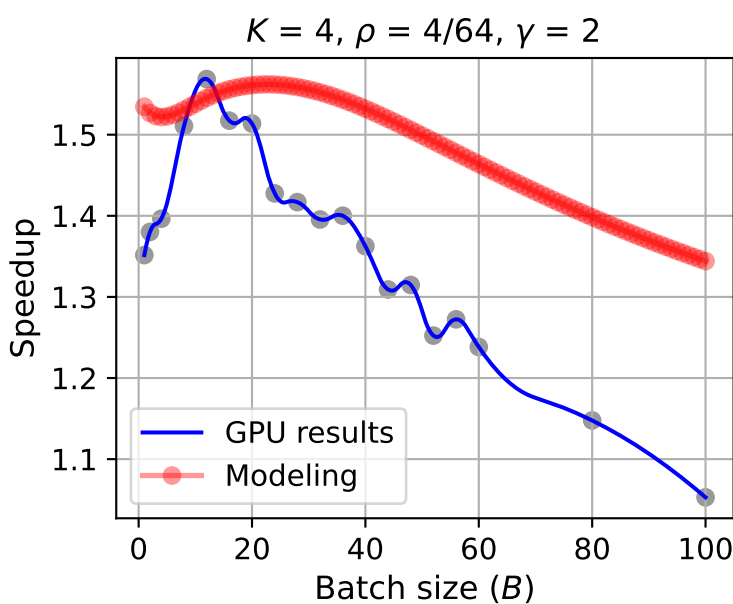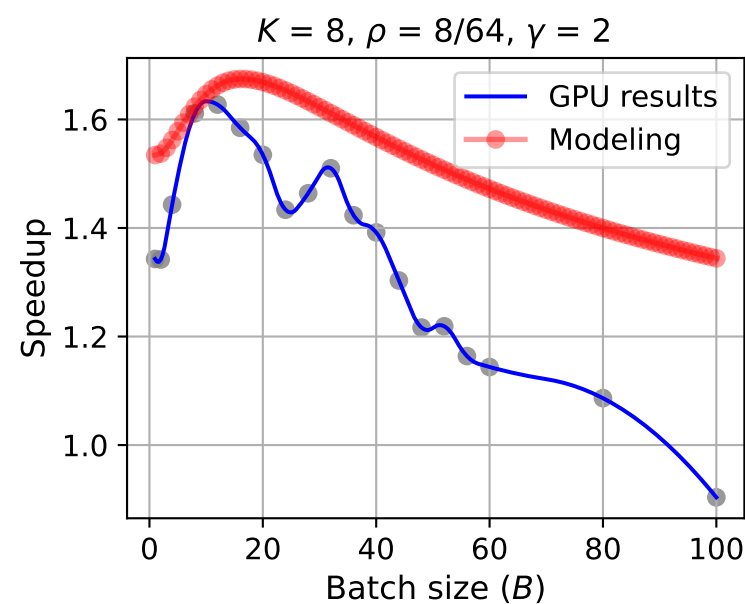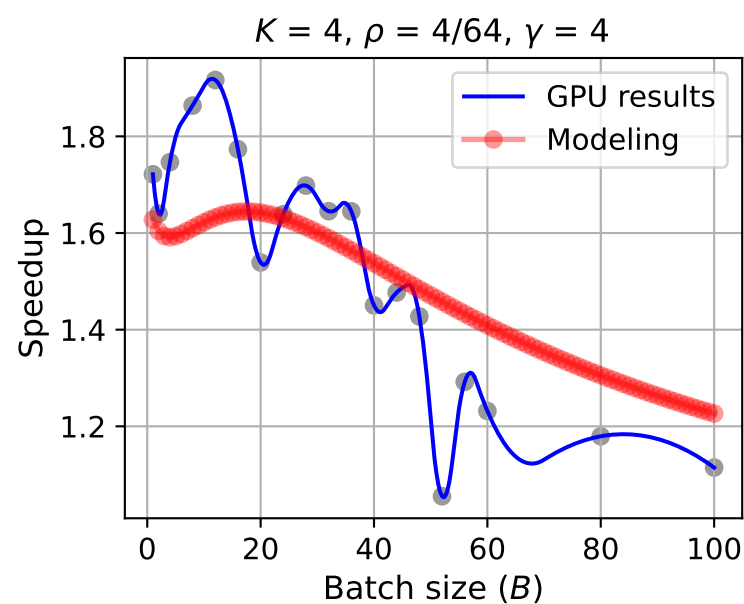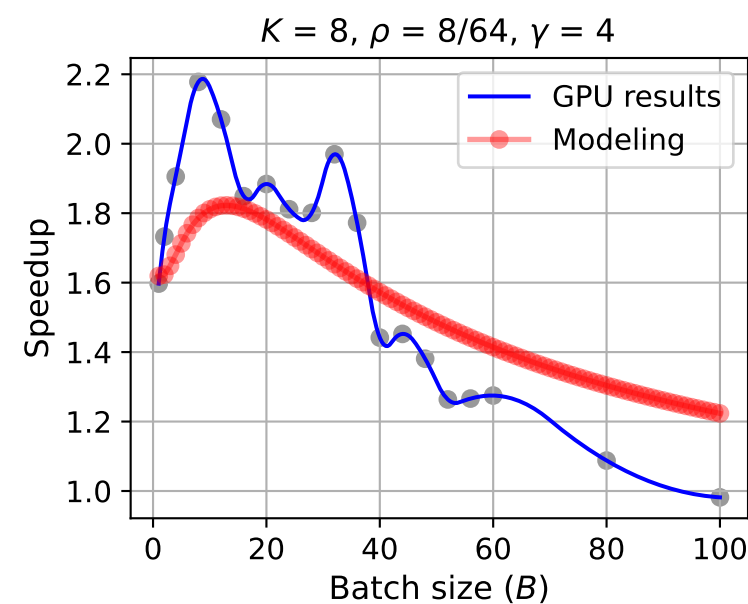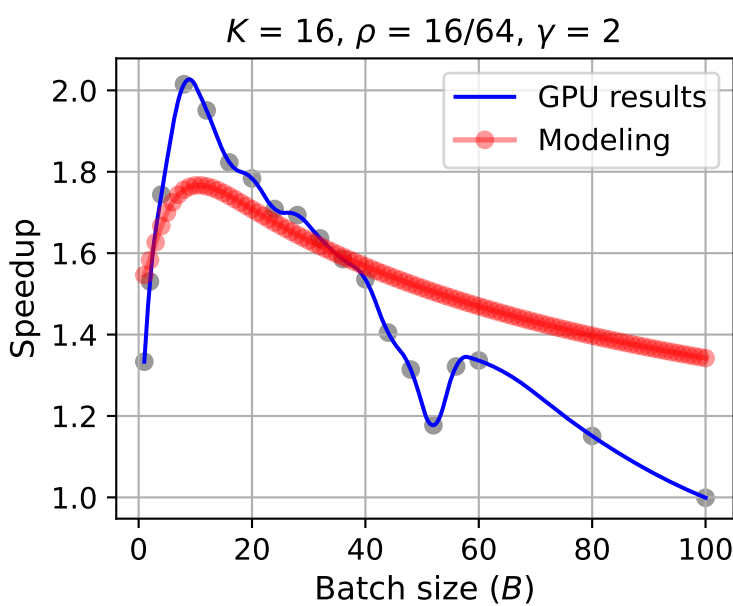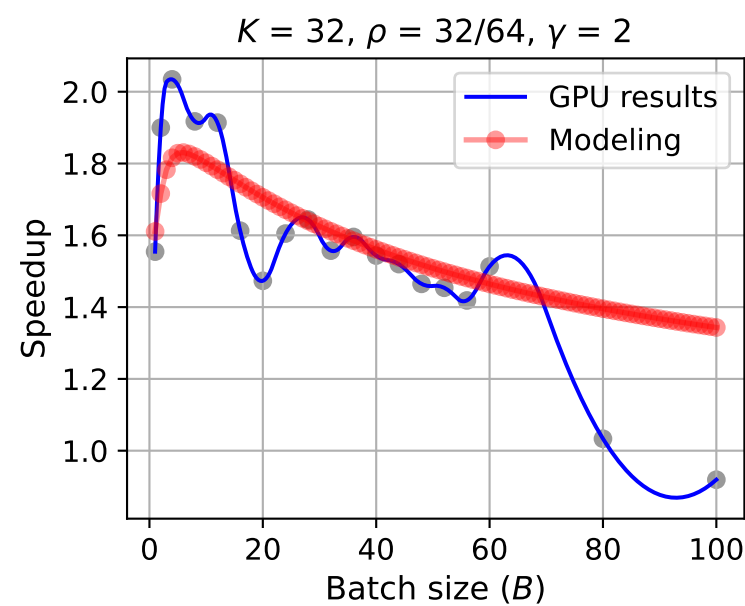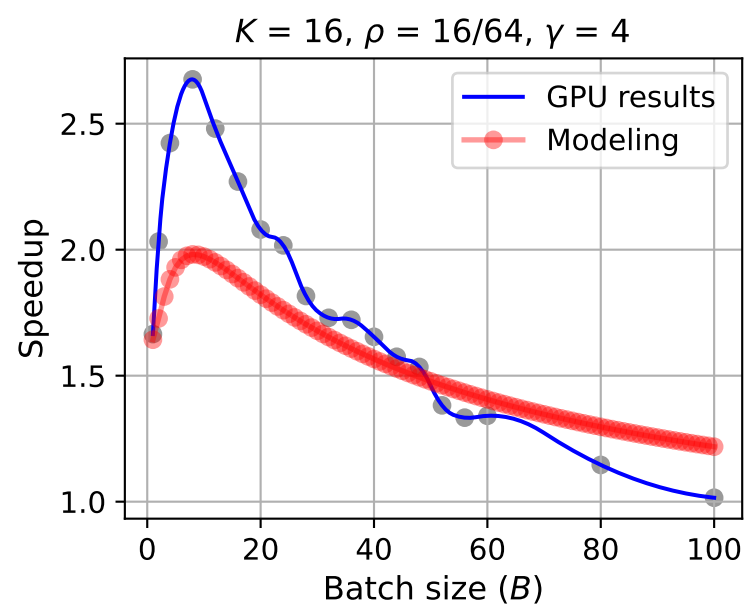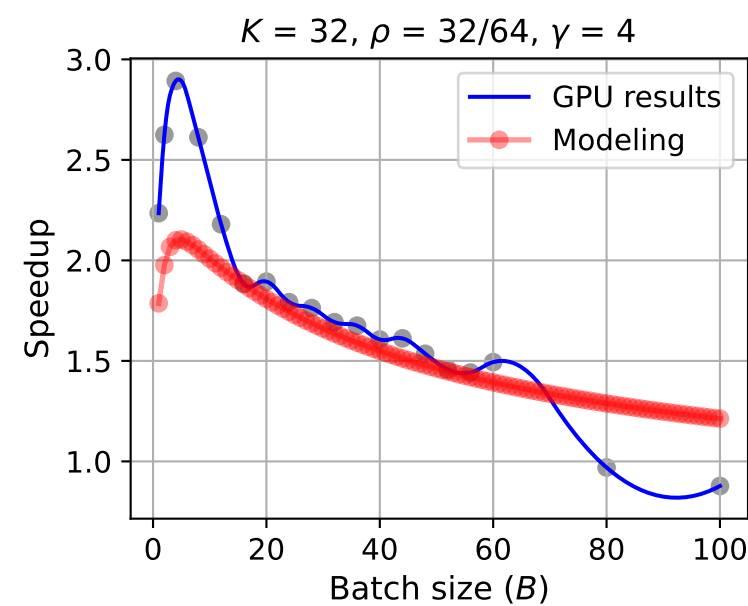

Supplement: supplementary_material [file fit_12_measurements.pdf › code/modeling/plot_example/appendix/fit_12_measurements.pdf]

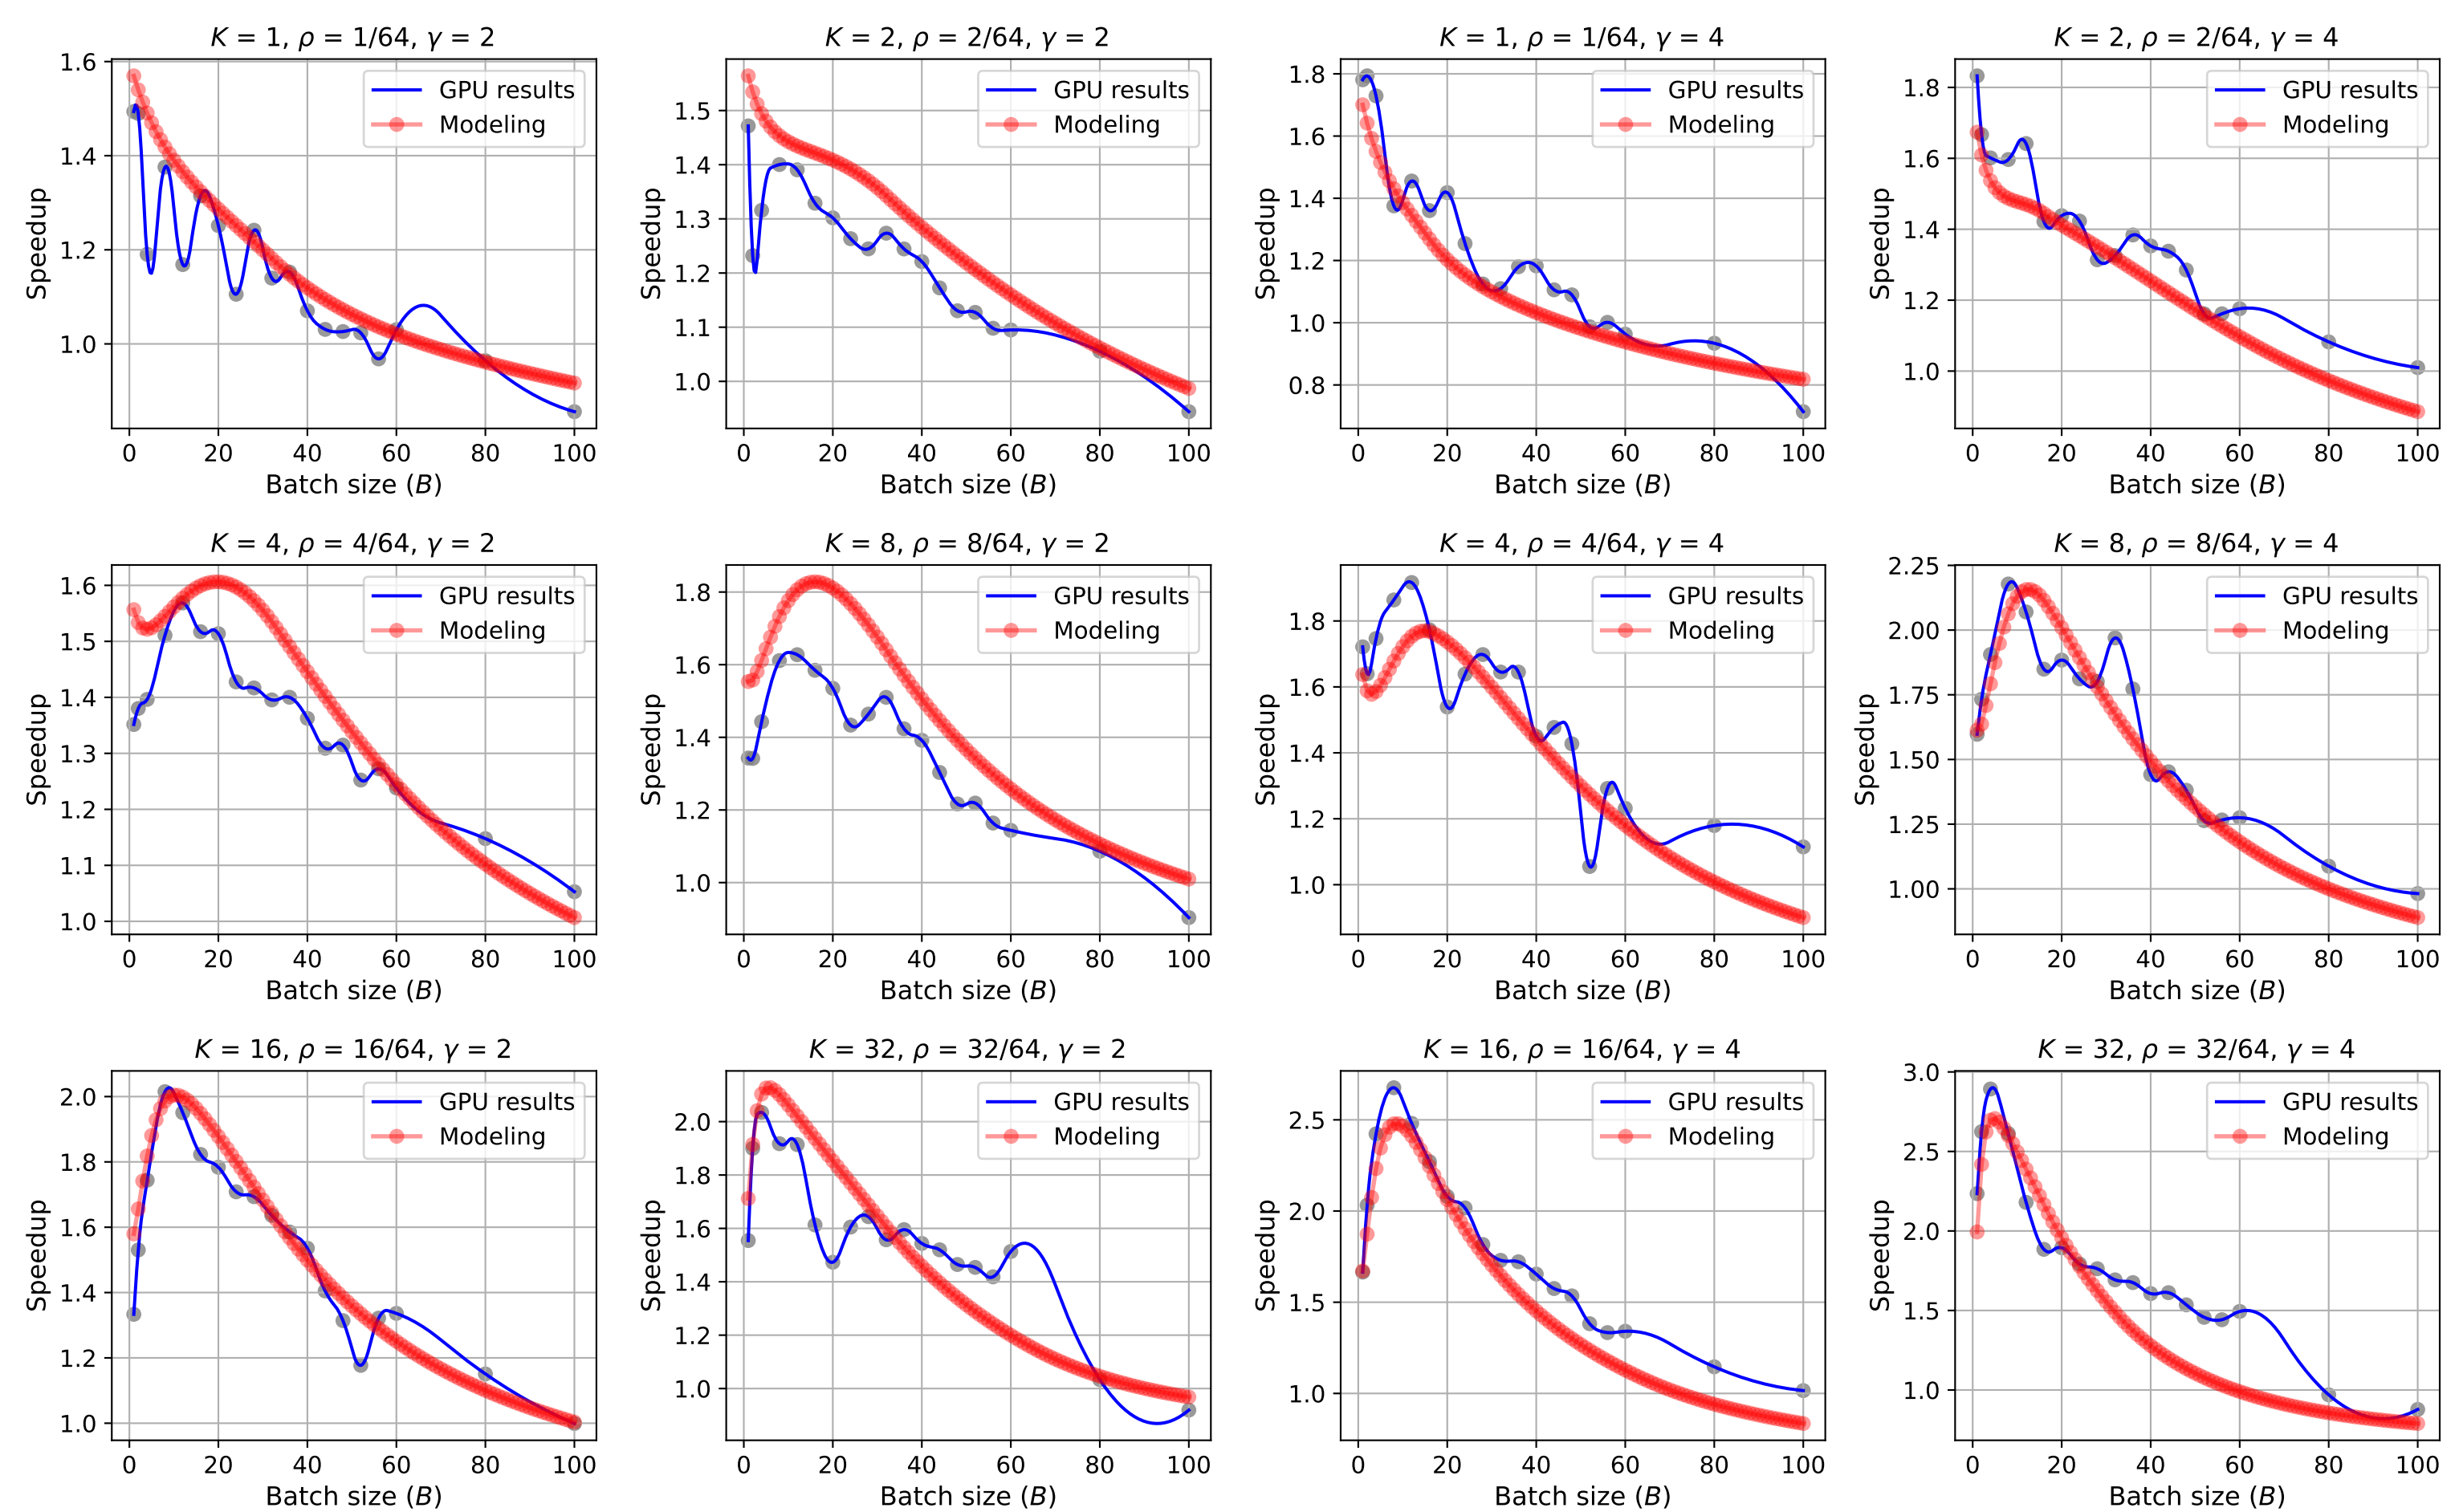

Supplement: supplementary_material [file fit_13_measurements.pdf › code/modeling/plot_example/appendix/fit_13_measurements.pdf]

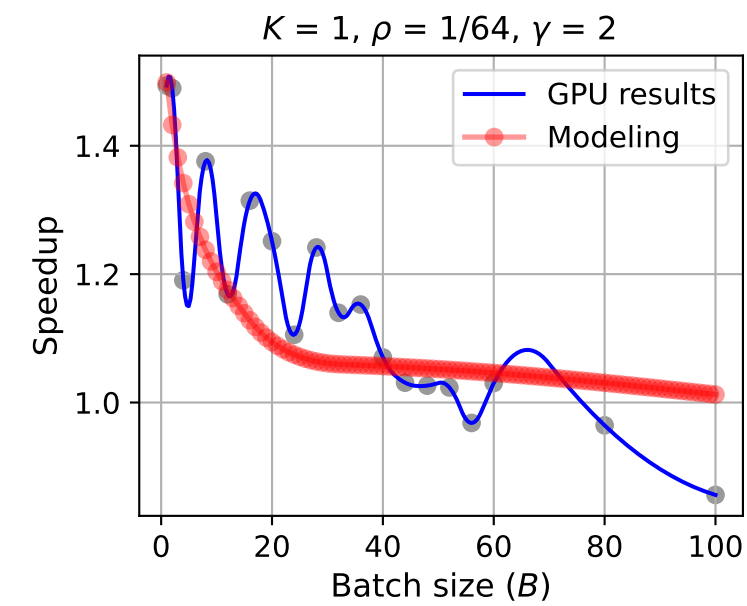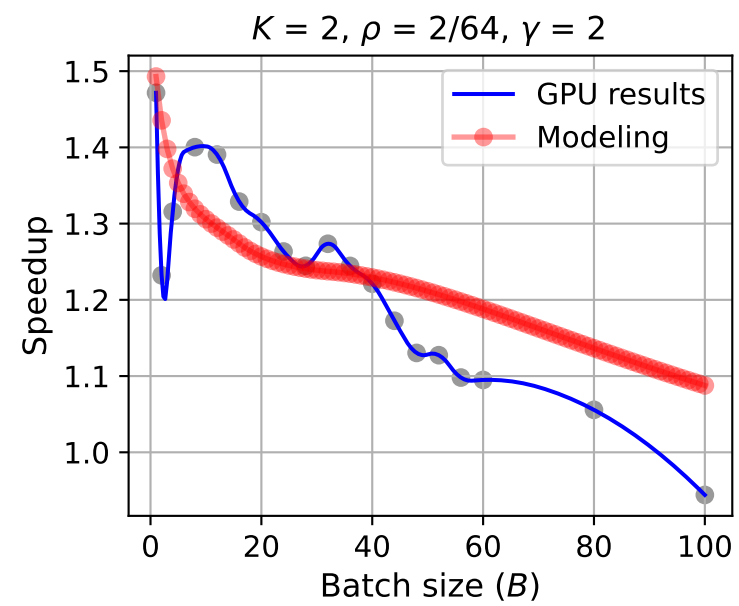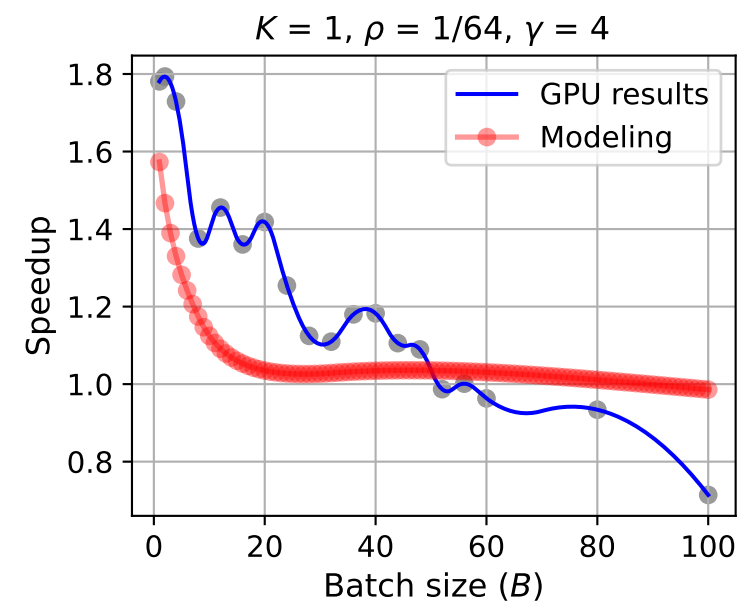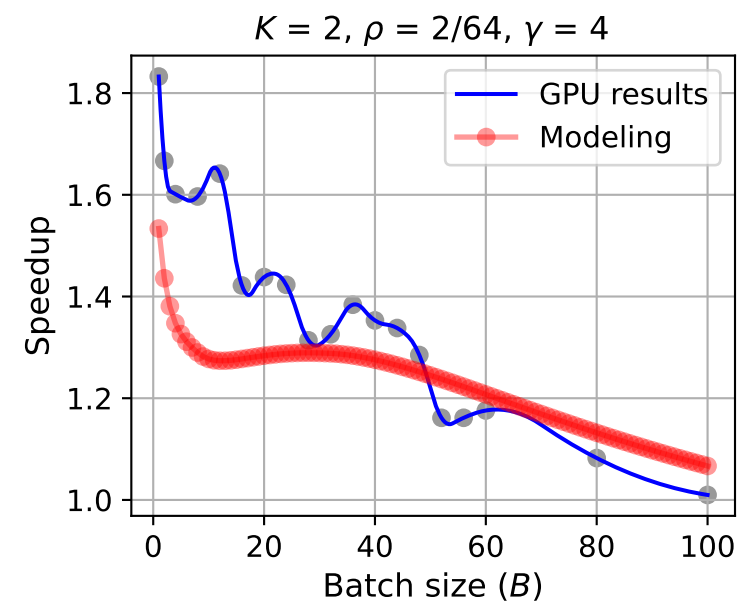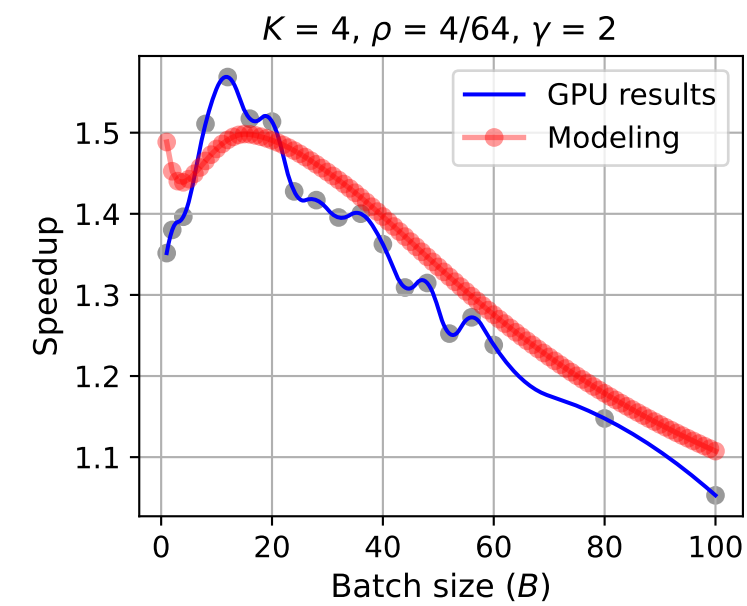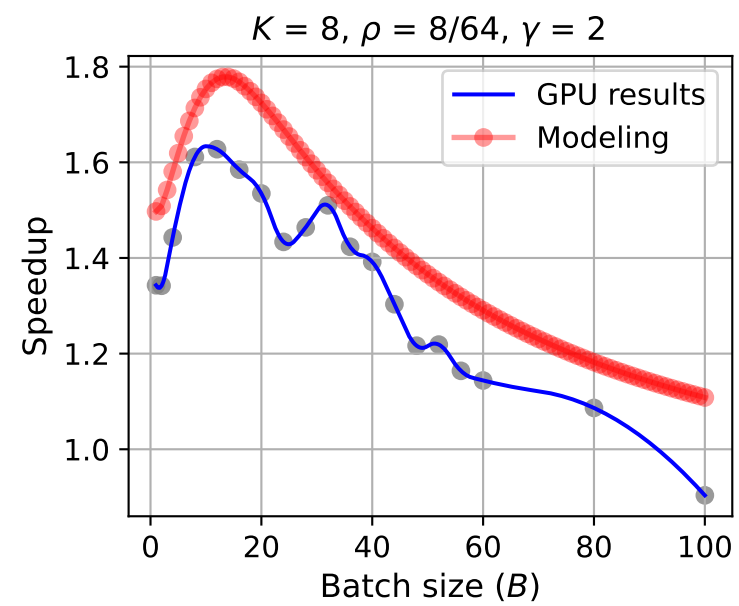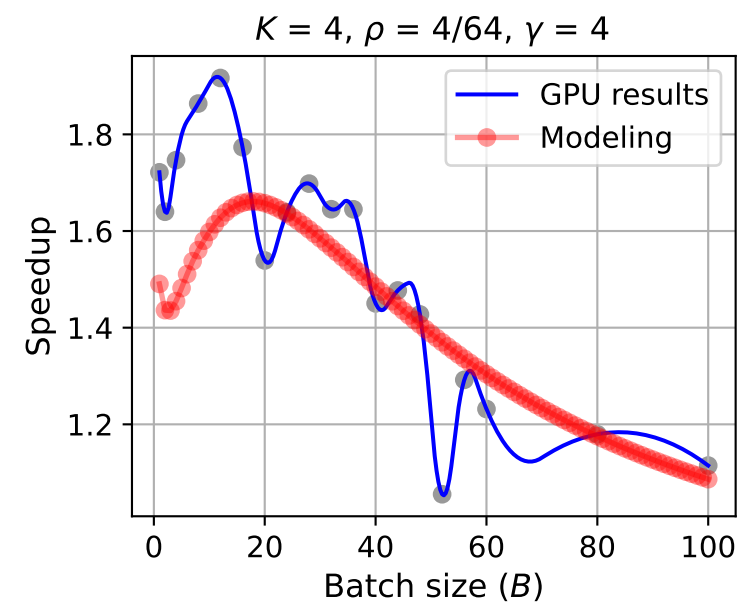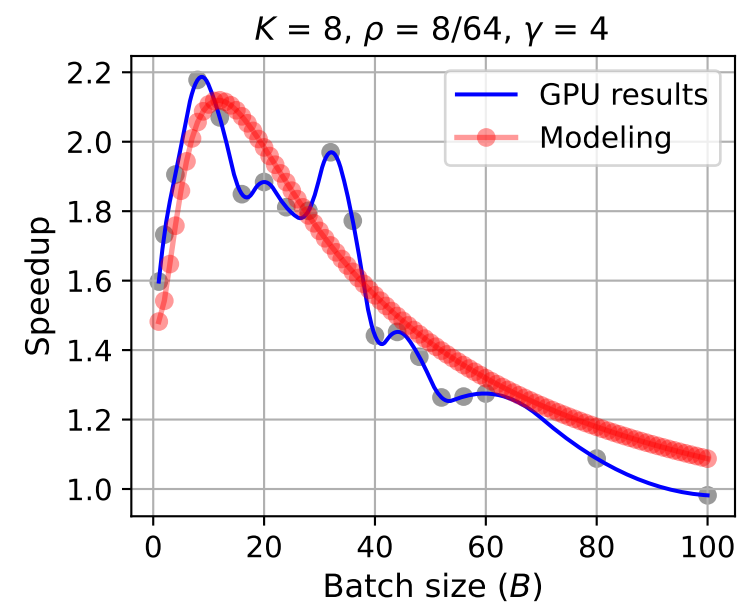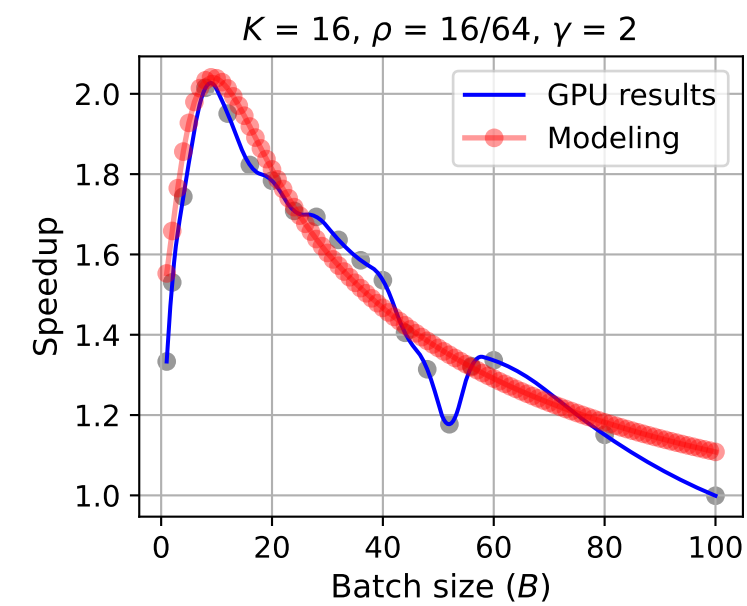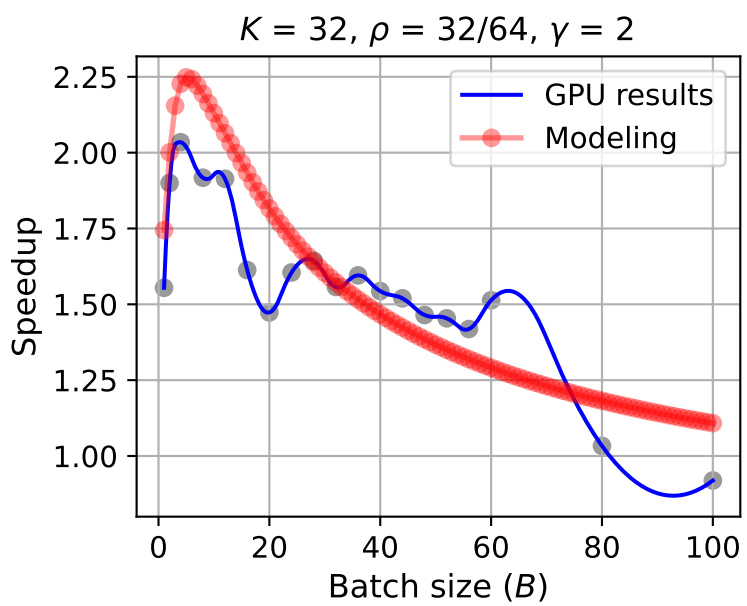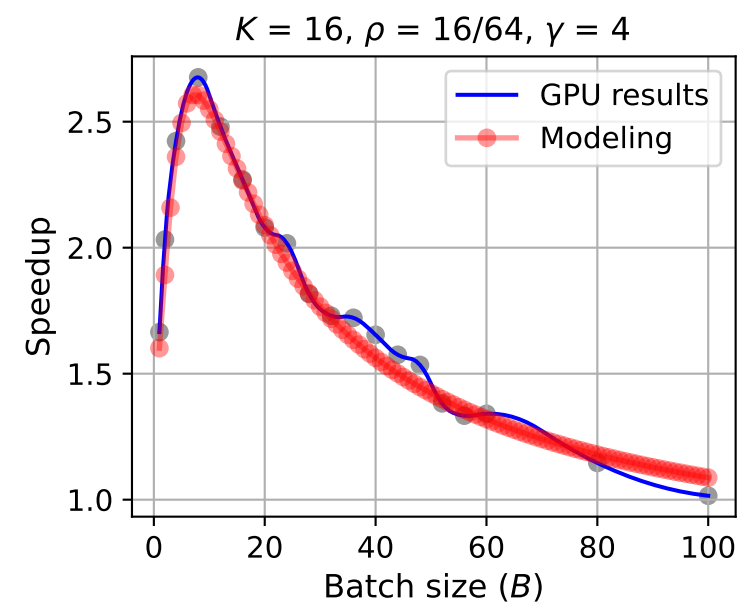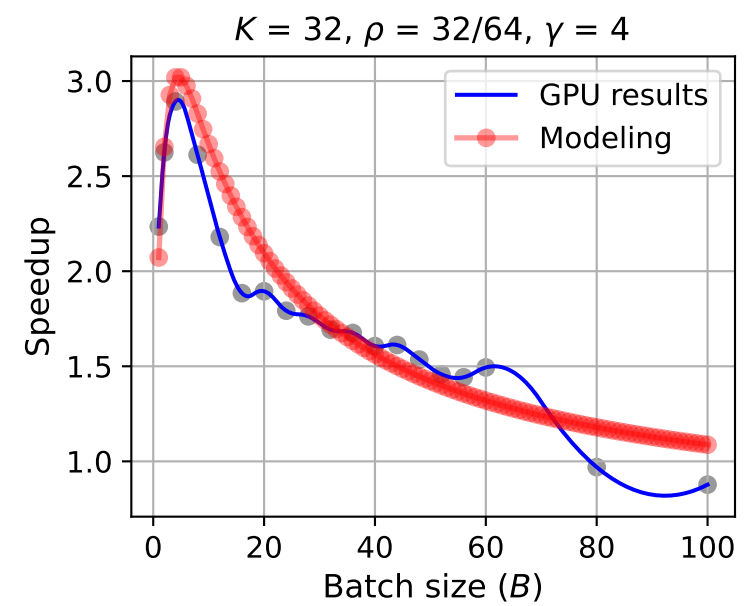

Supplement: supplementary_material [file fit_14_measurements.pdf › code/modeling/plot_example/appendix/fit_14_measurements.pdf]

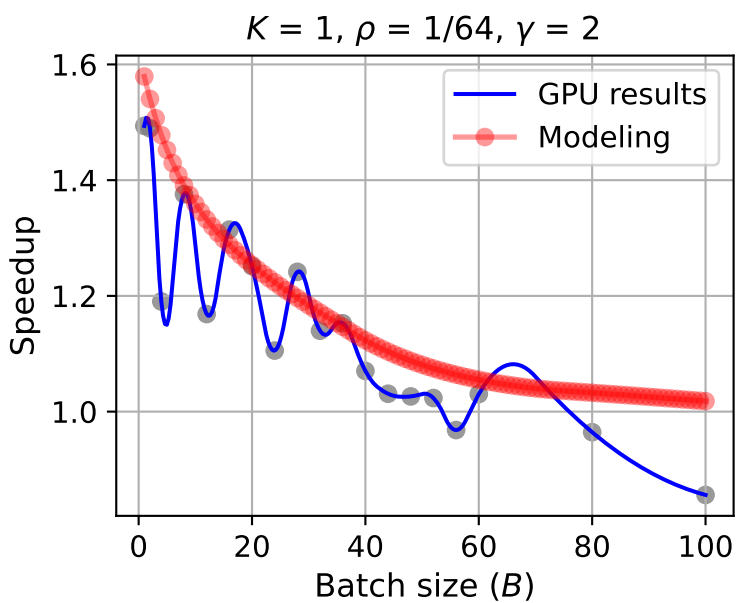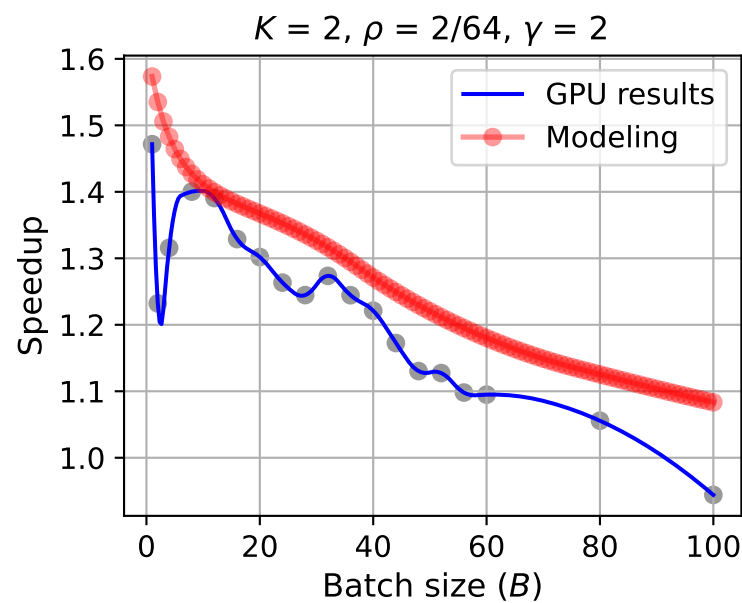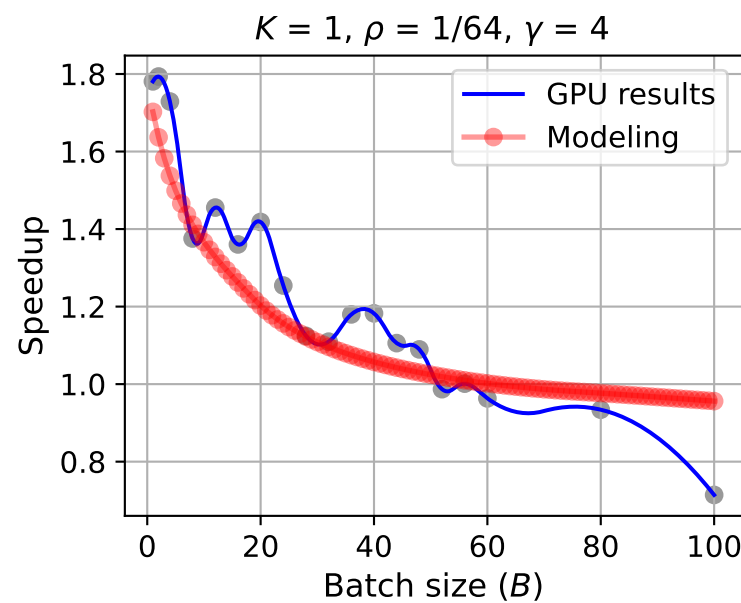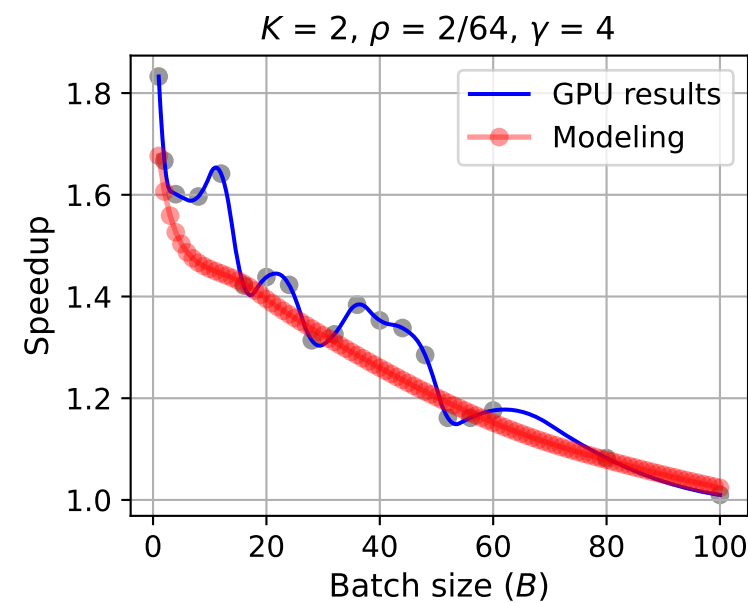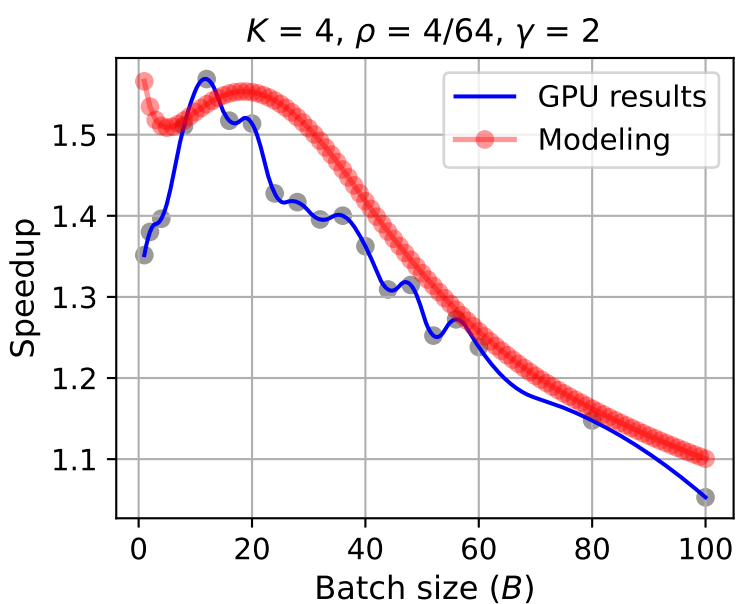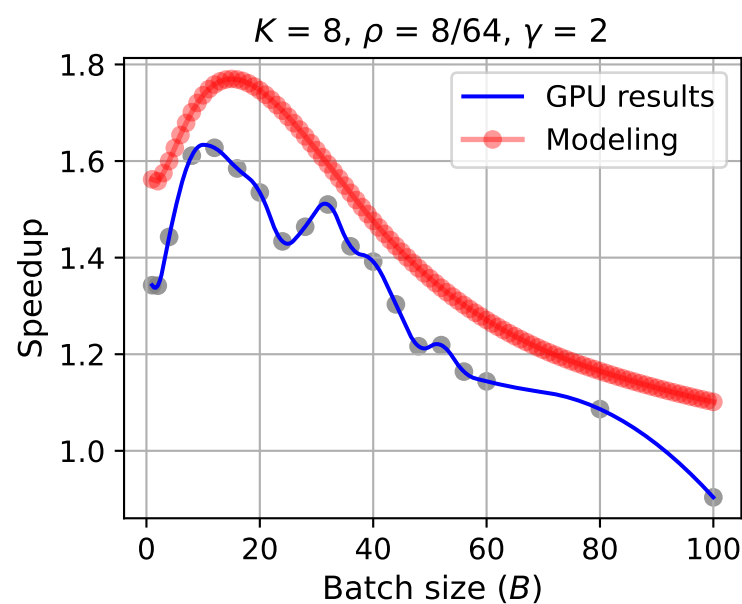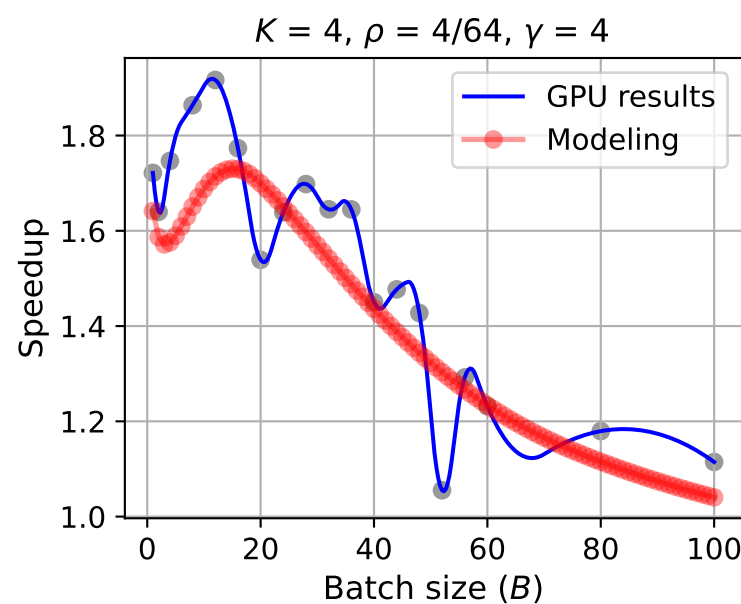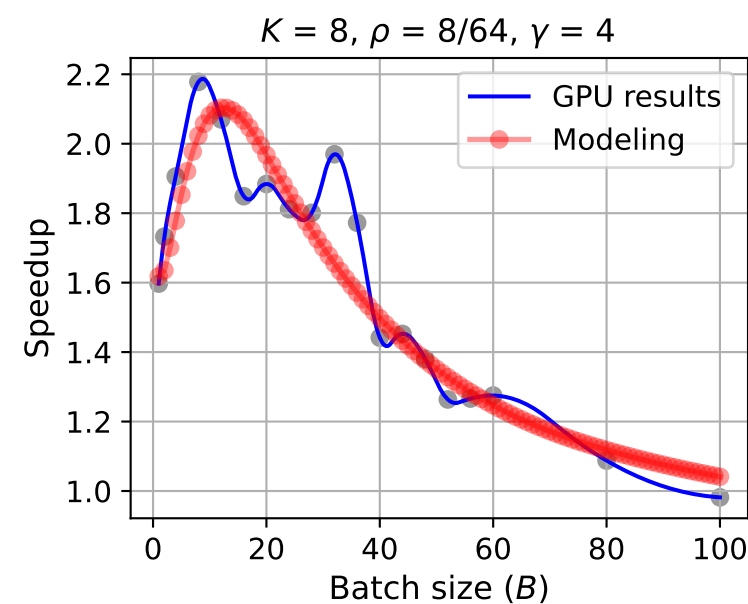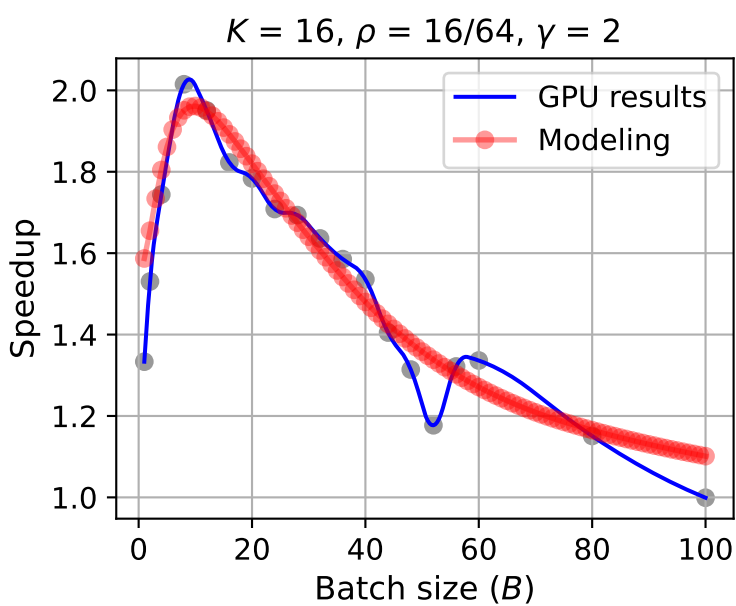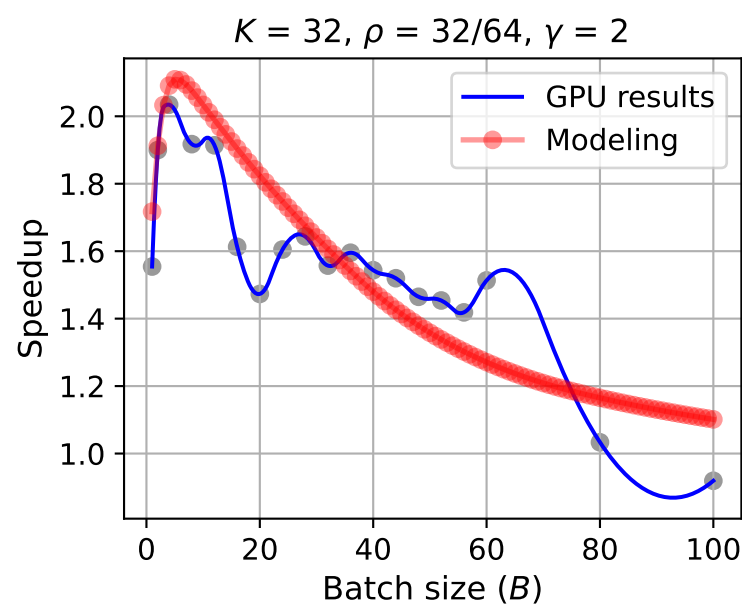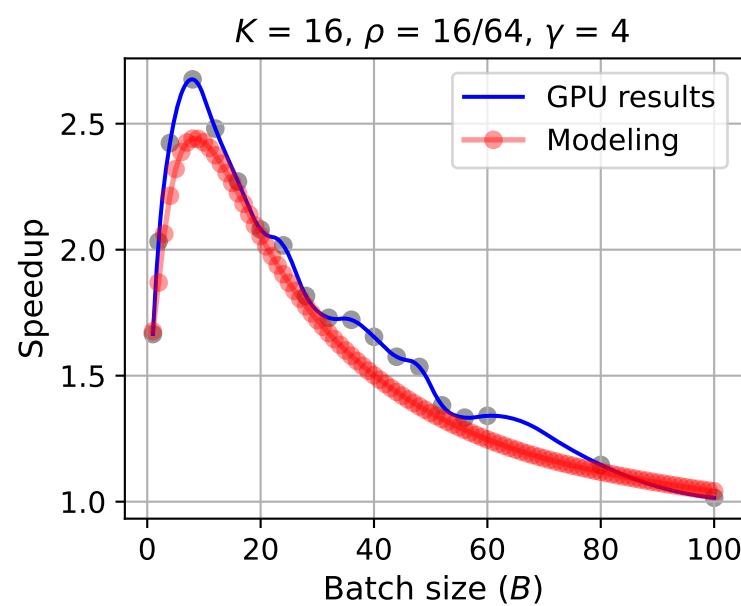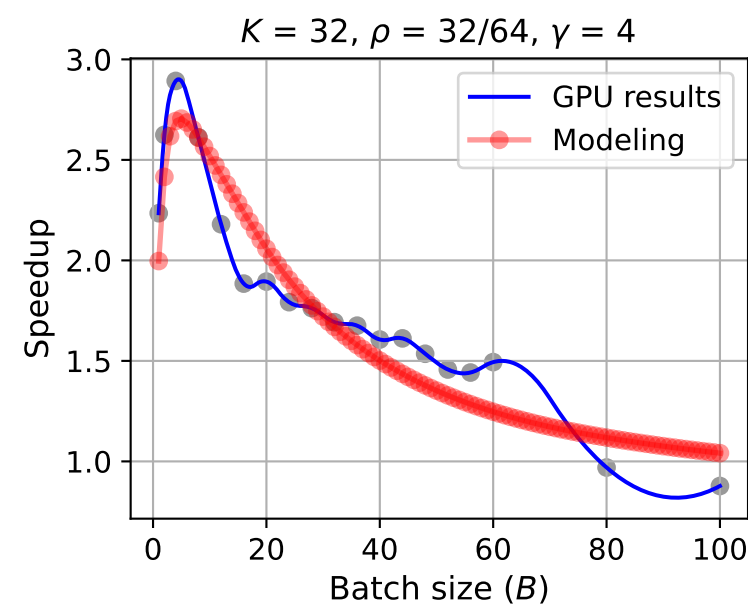

Supplement: supplementary_material [file fit_15_measurements.pdf › code/modeling/plot_example/appendix/fit_15_measurements.pdf]

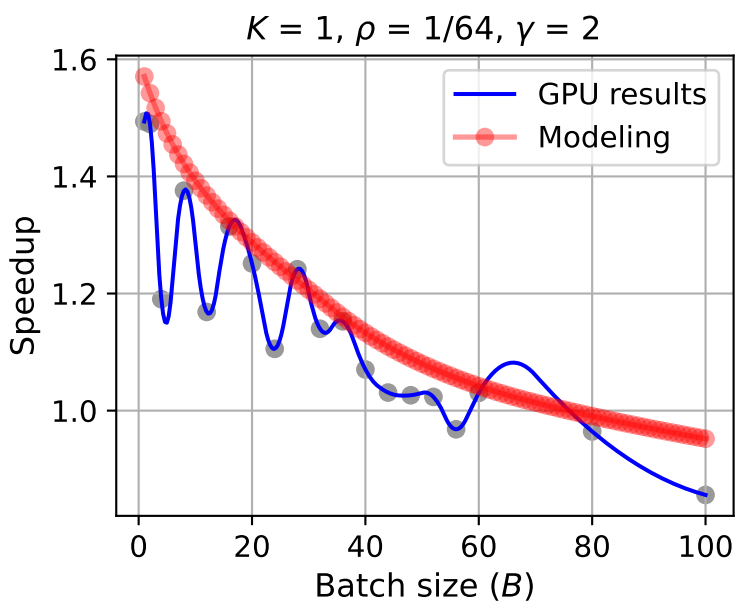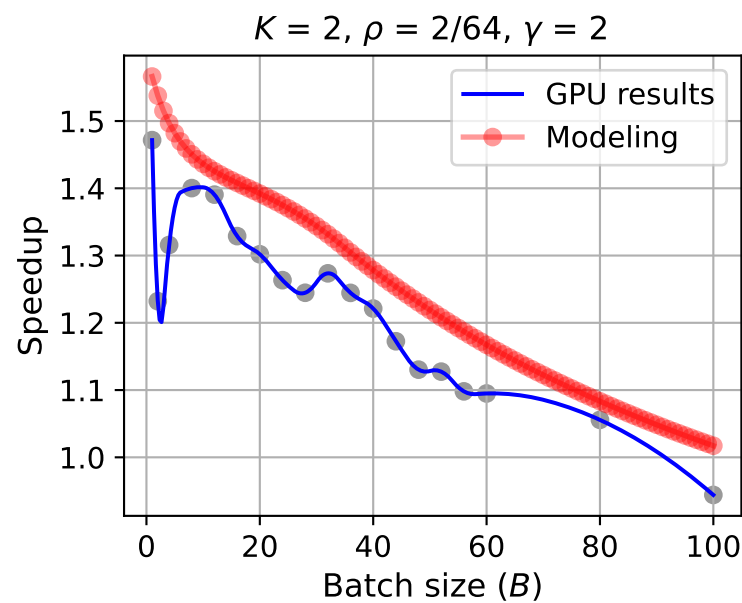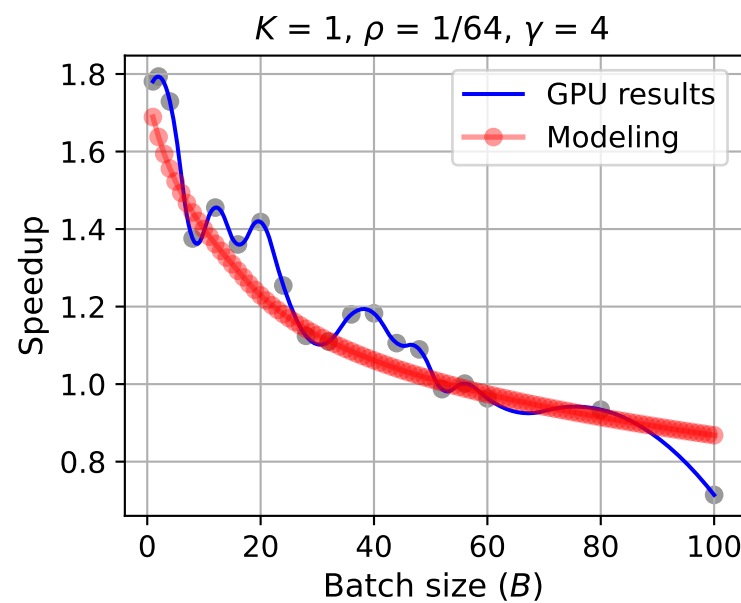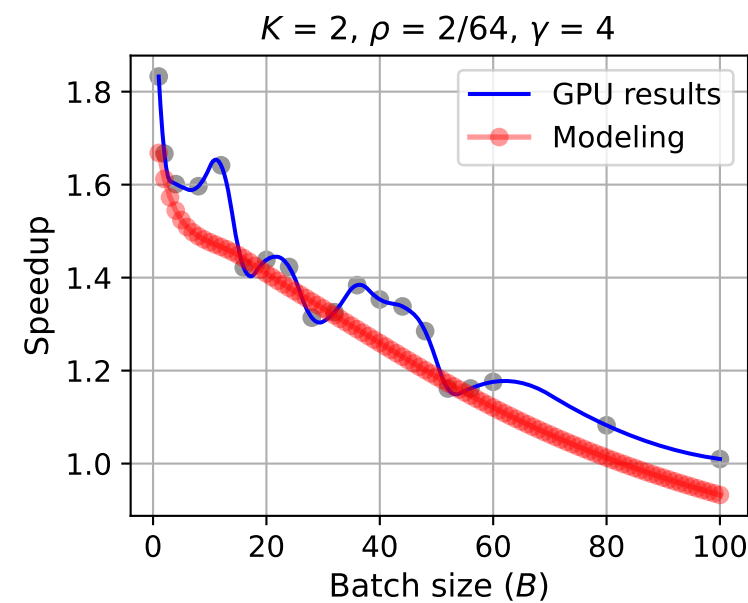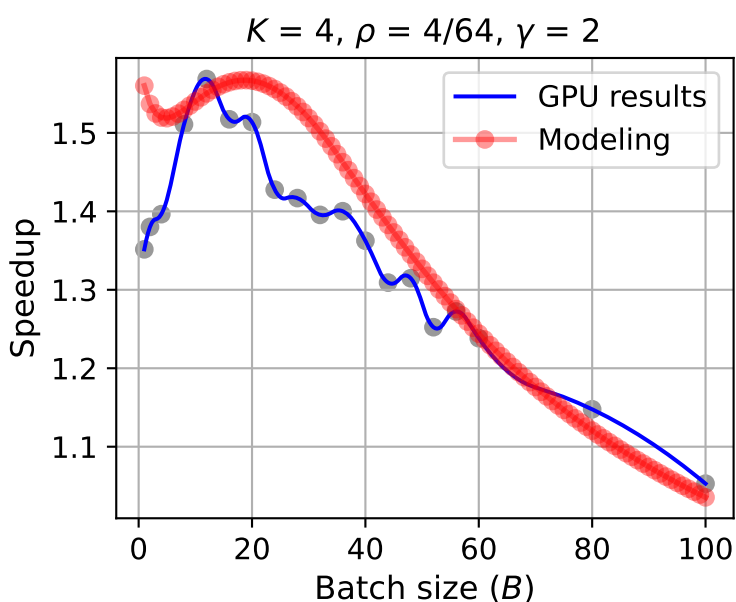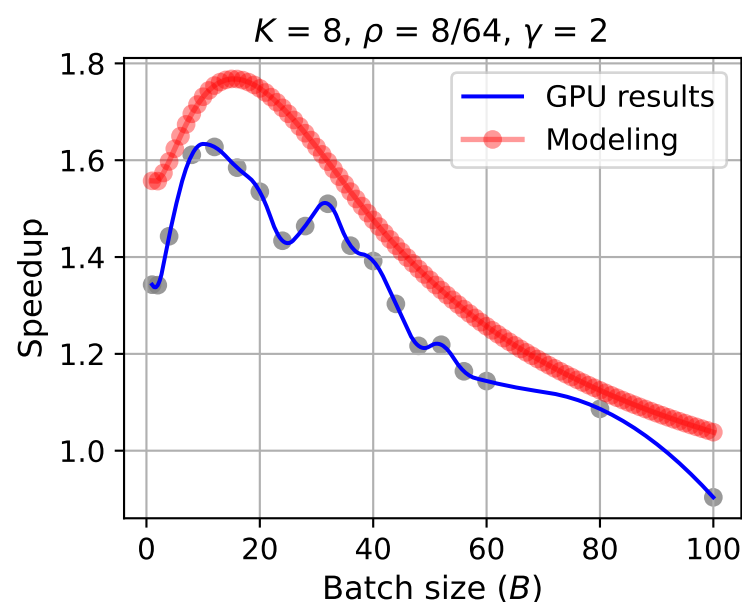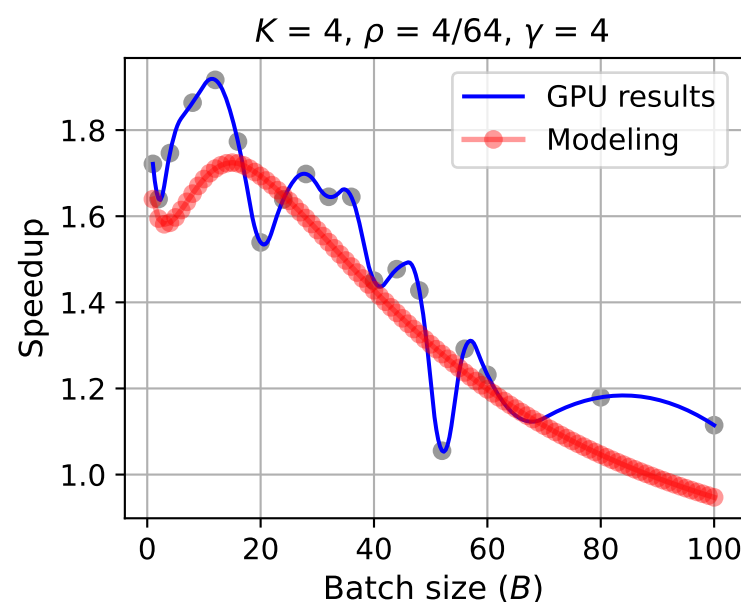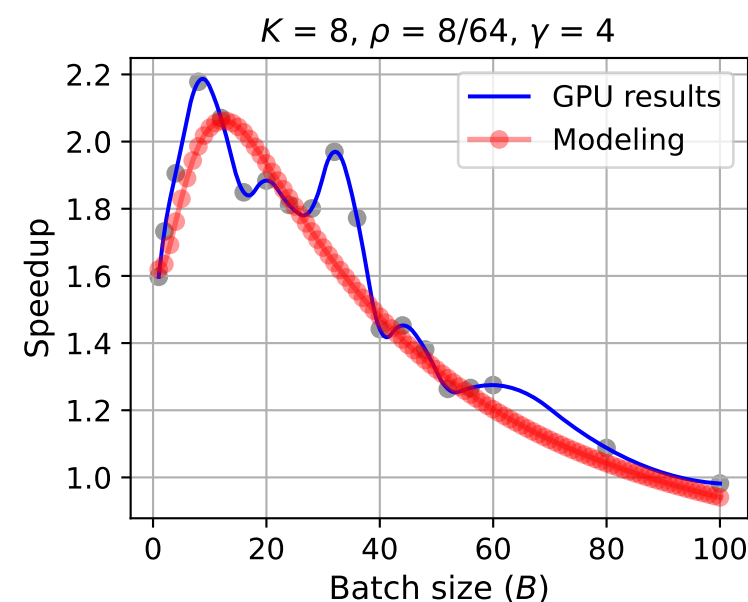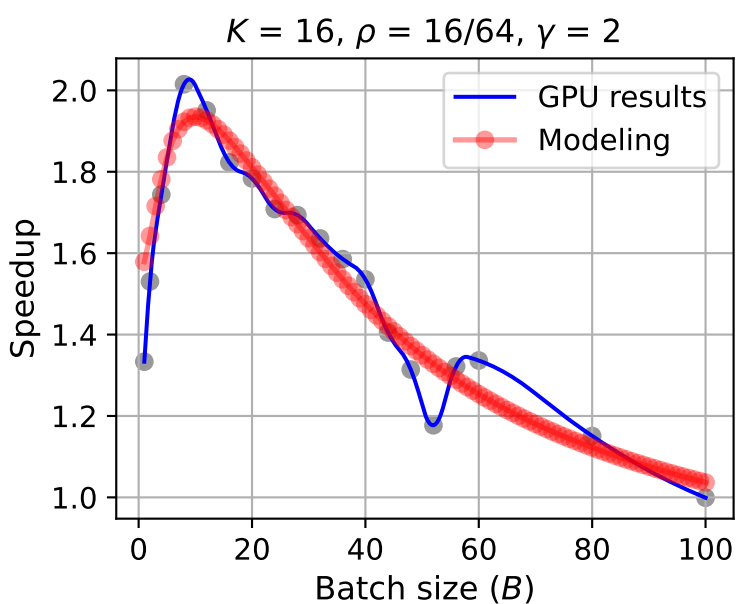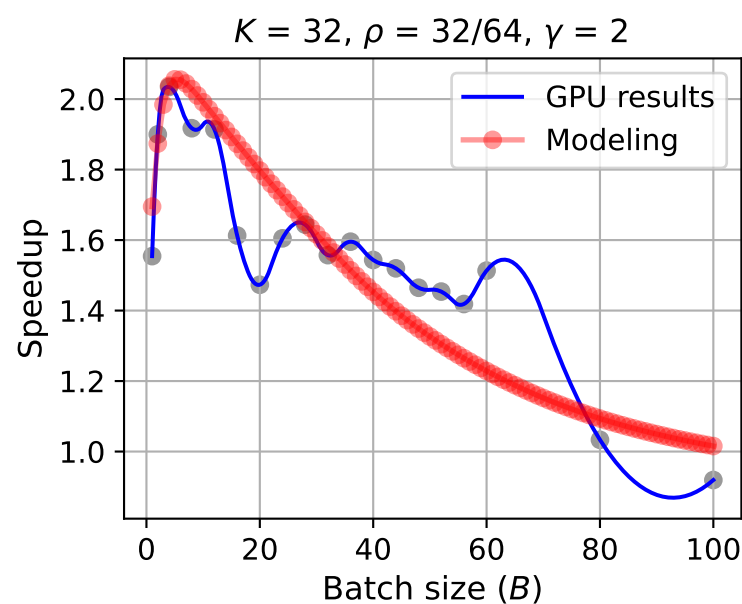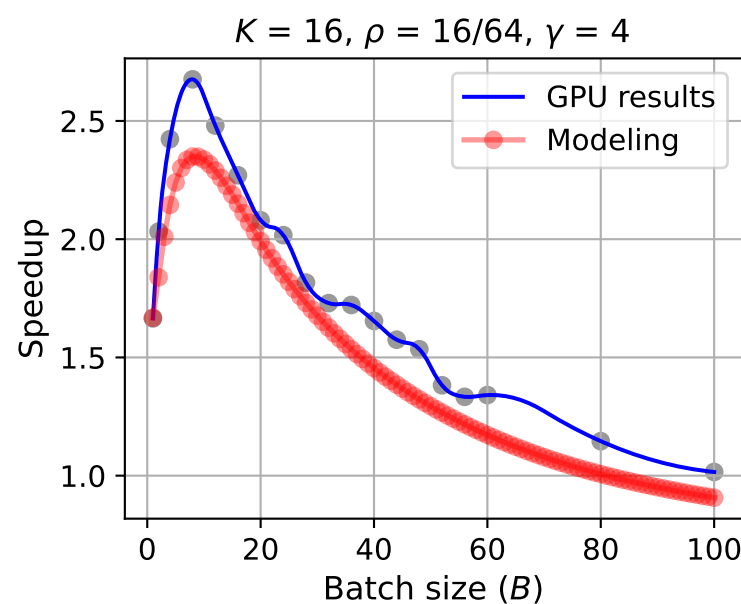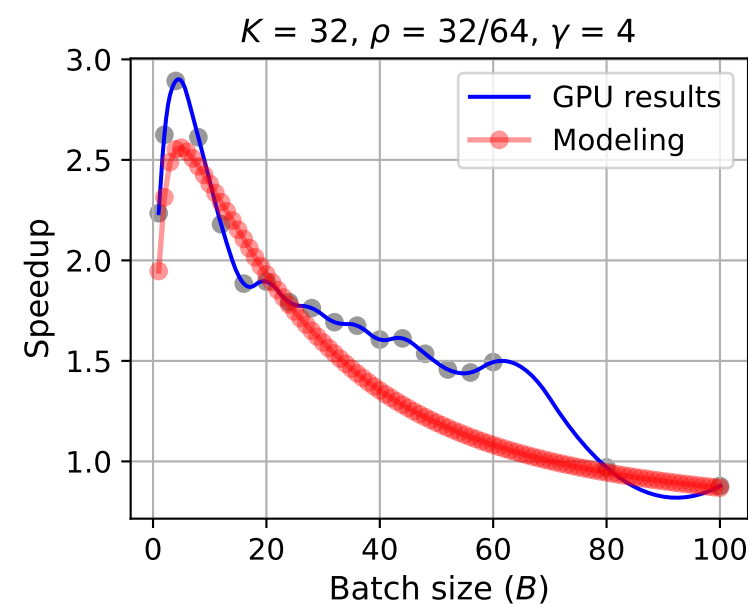

Supplement: supplementary_material [file fit_19_measurements.pdf › code/modeling/plot_example/appendix/fit_19_measurements.pdf]

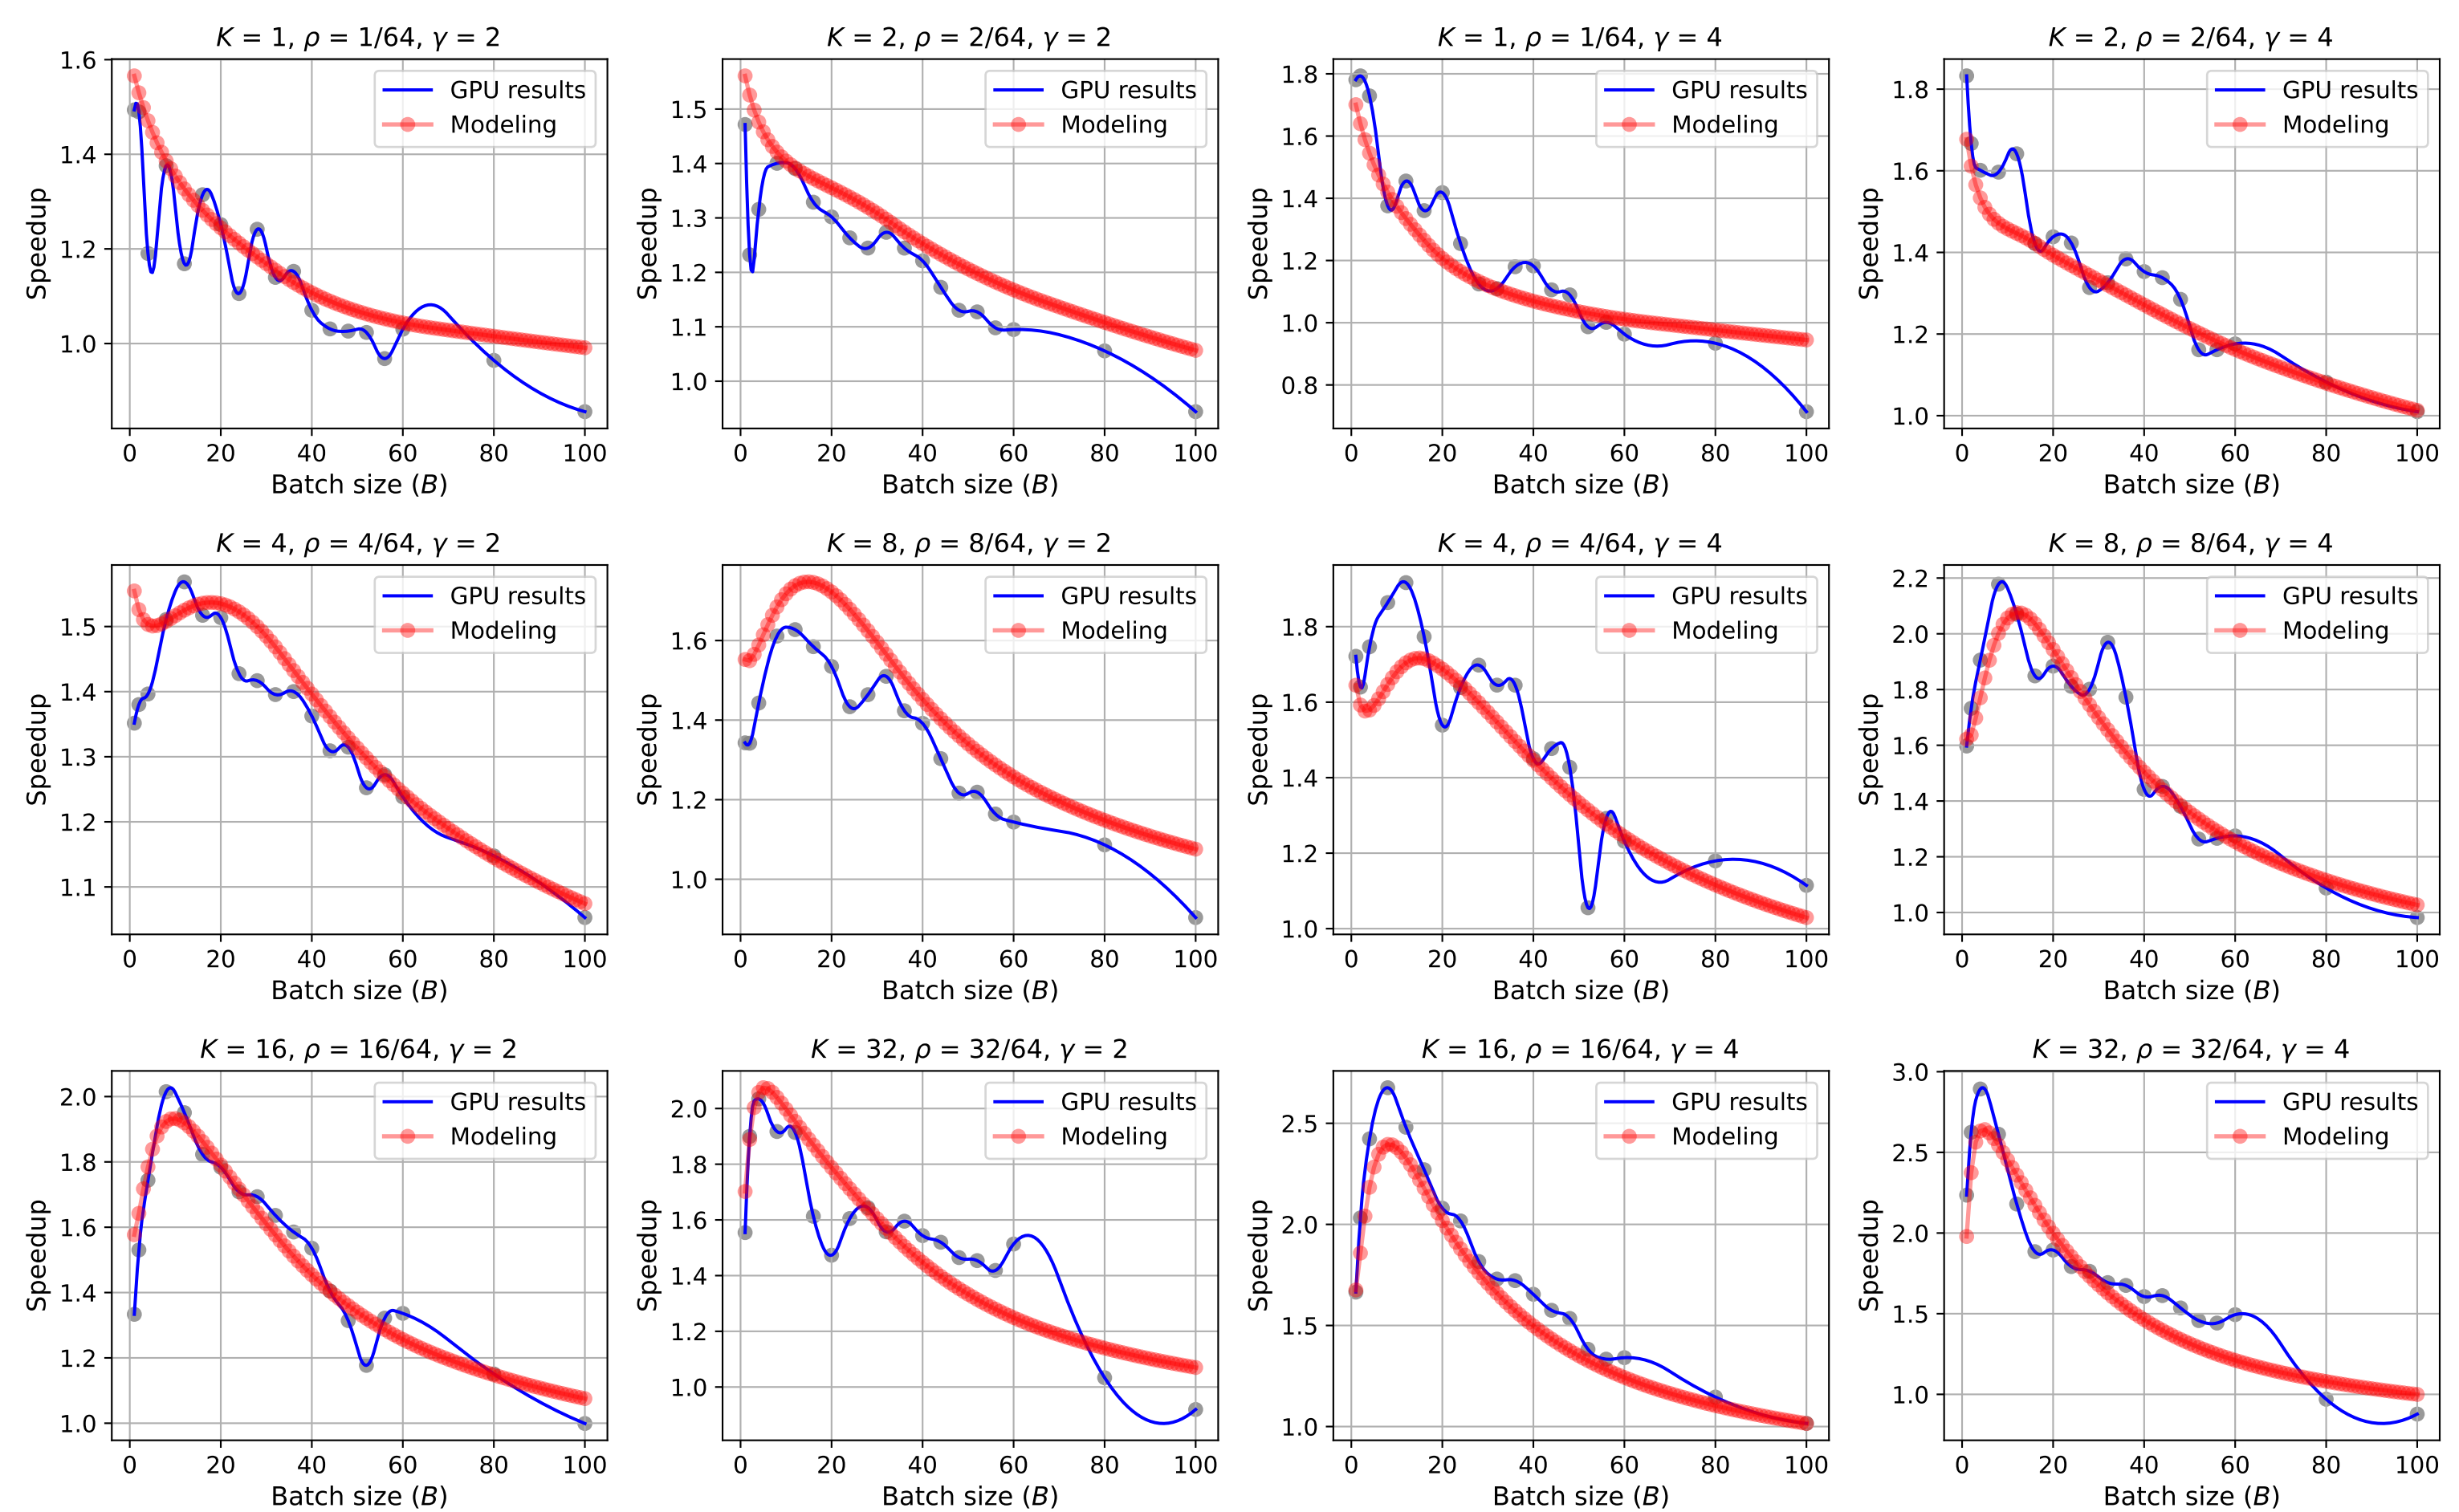

Supplement: supplementary_material [file fit_228_measurements.pdf › code/modeling/plot_example/appendix/fit_228_measurements.pdf]

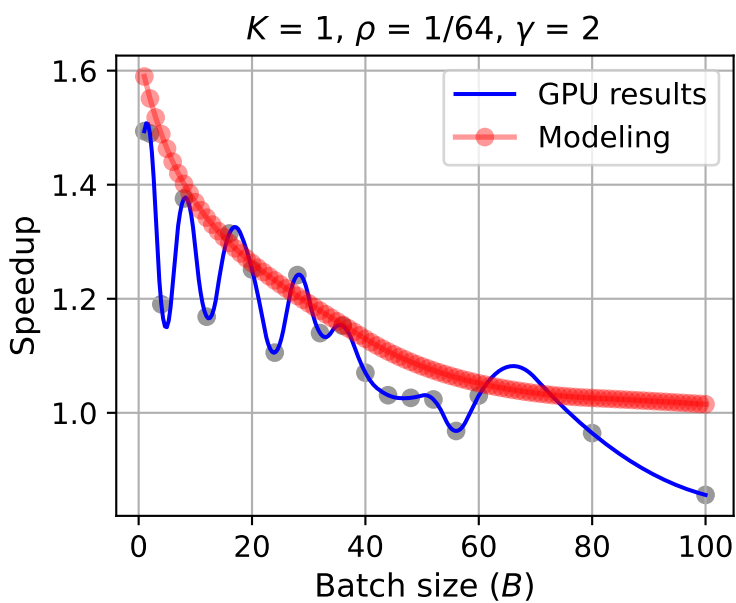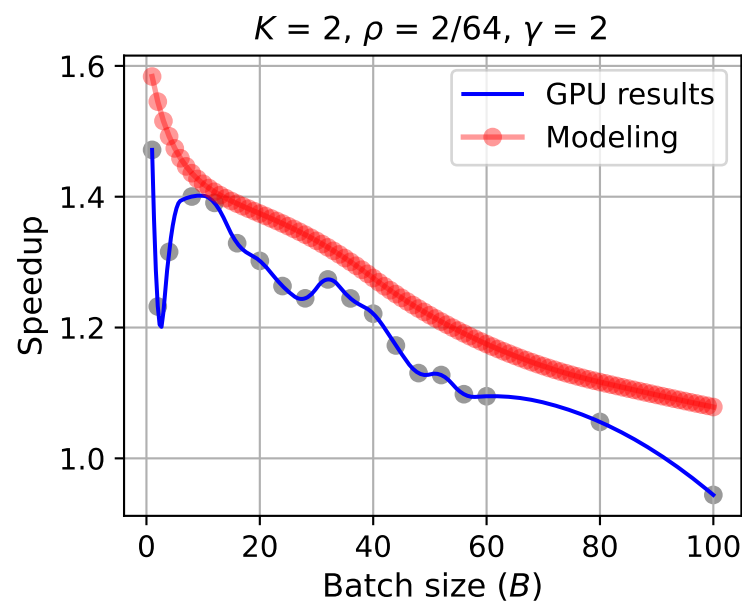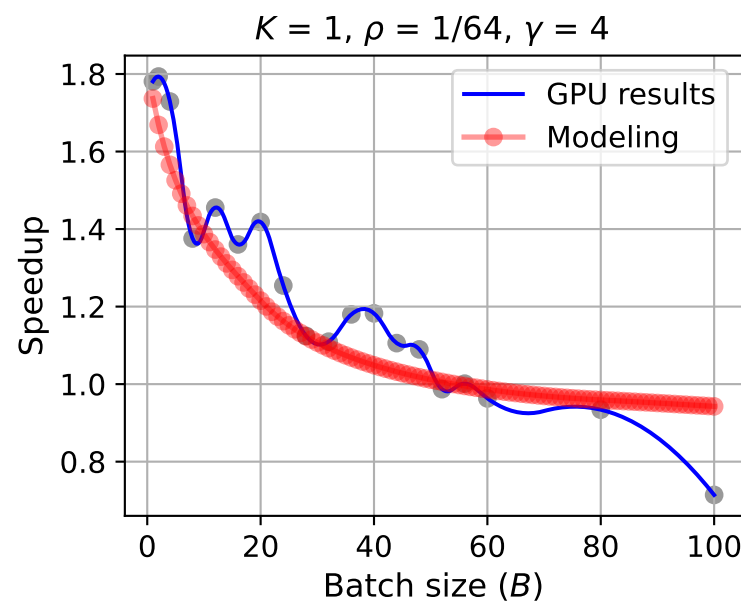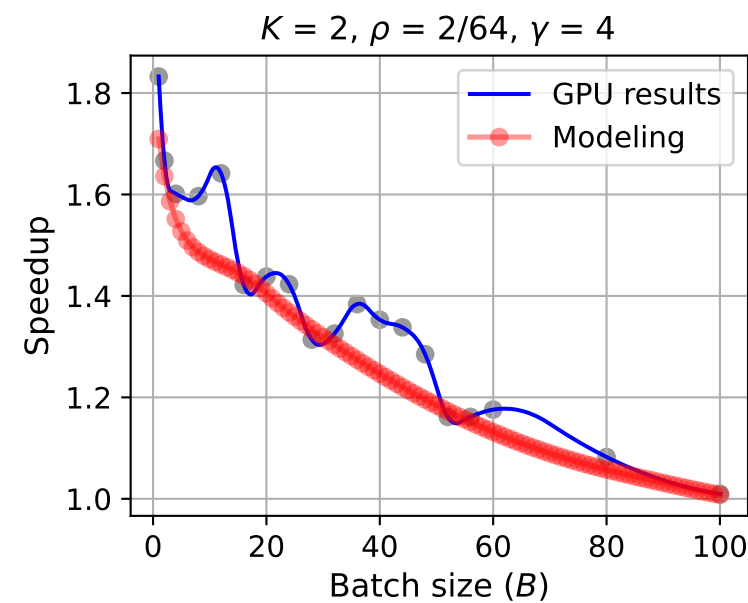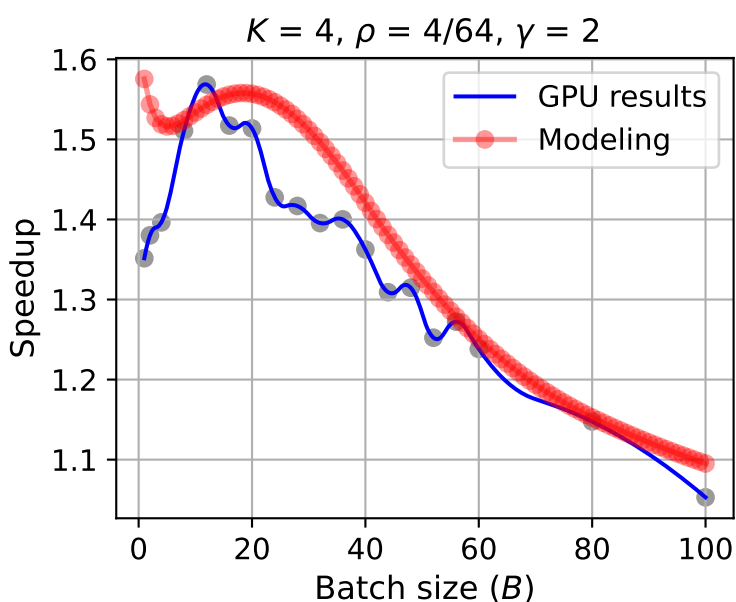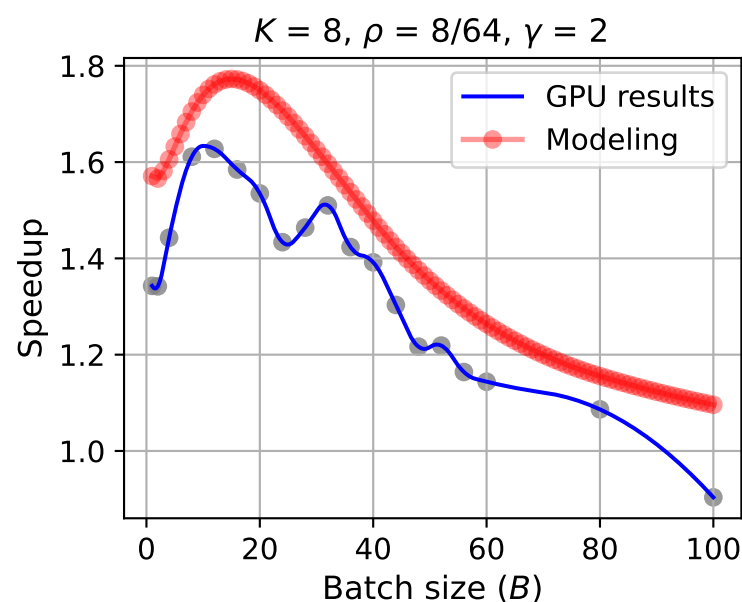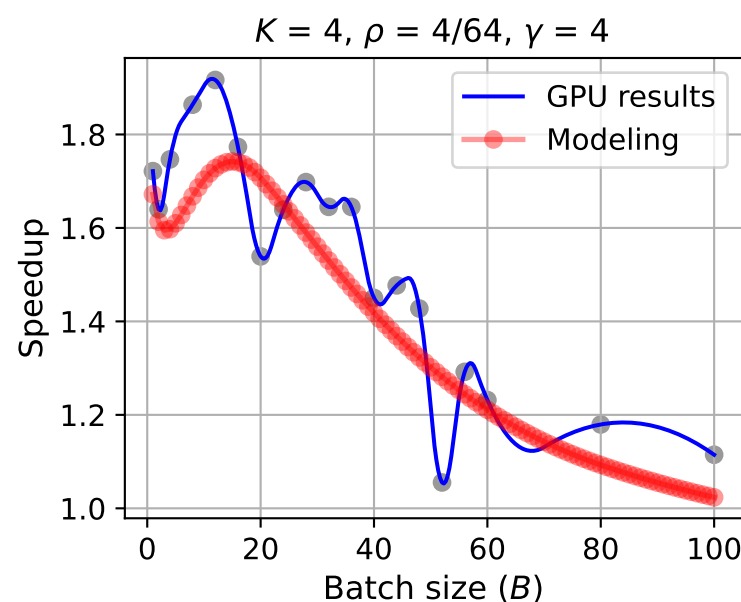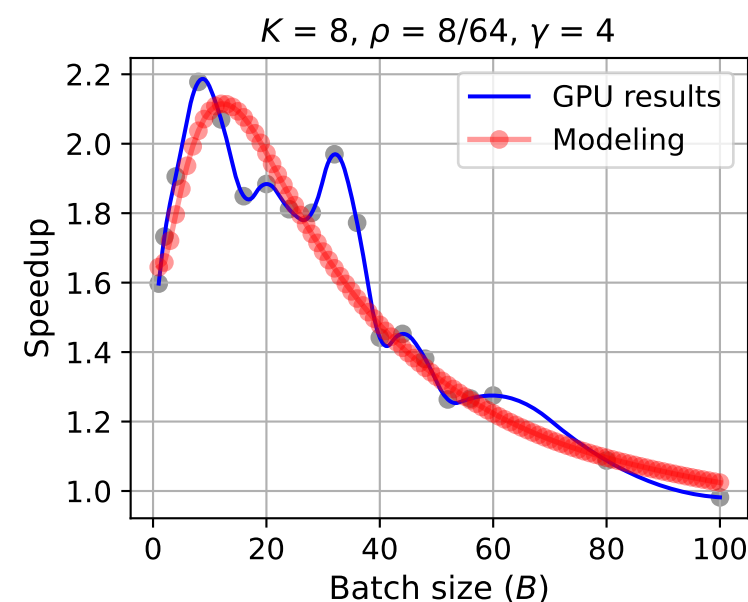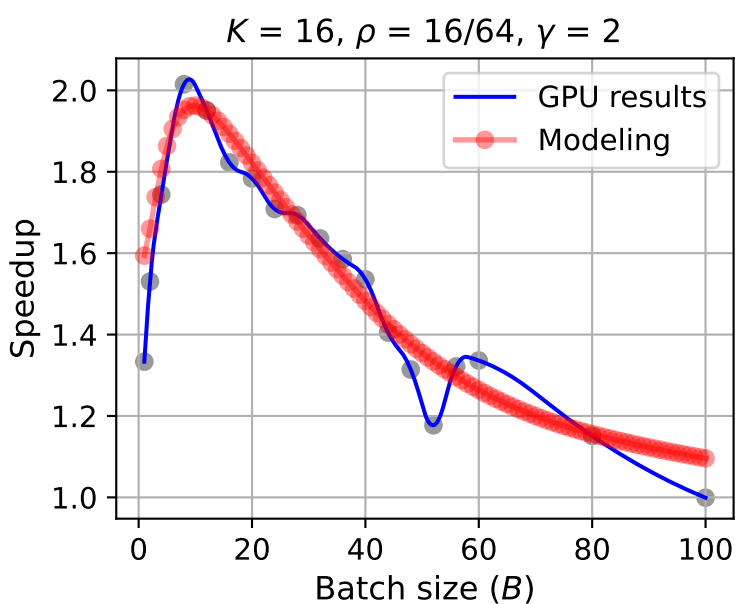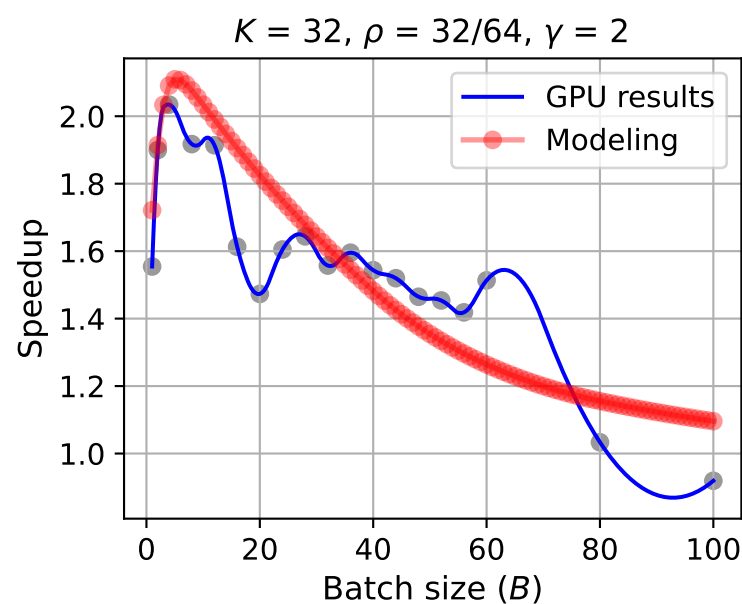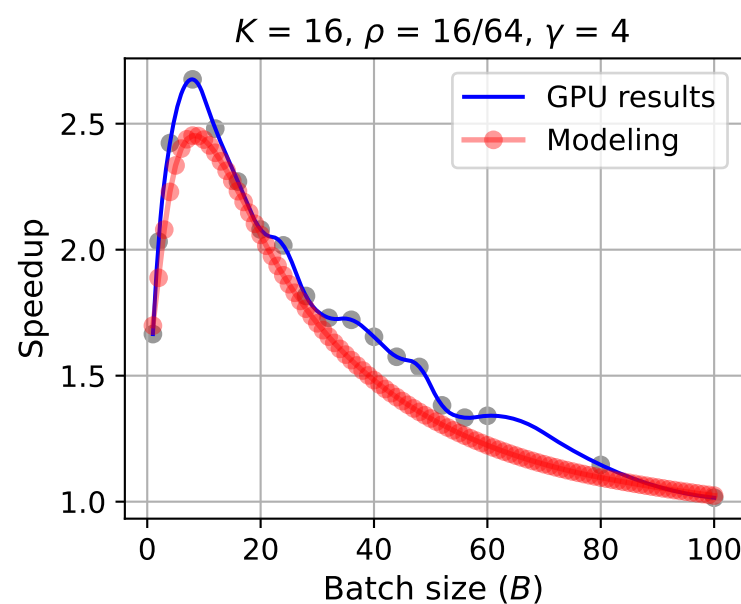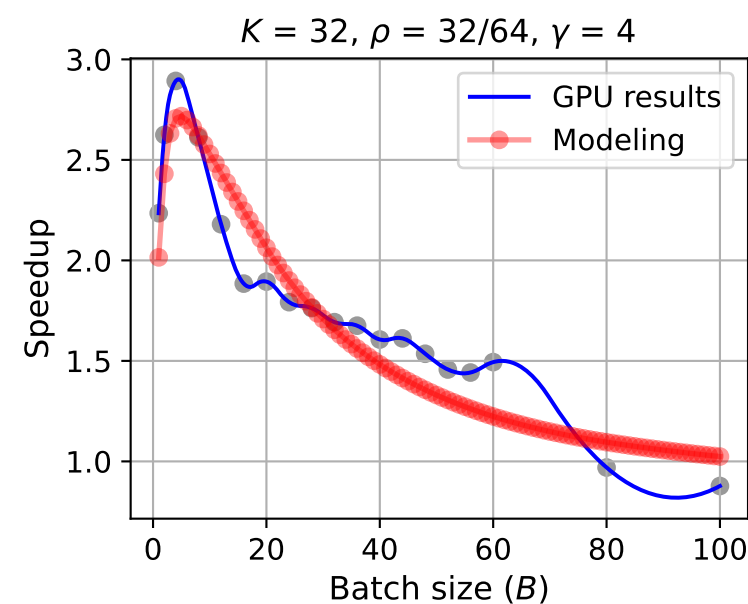

Supplement: supplementary_material [file fit_23_measurements.pdf › code/modeling/plot_example/appendix/fit_23_measurements.pdf]

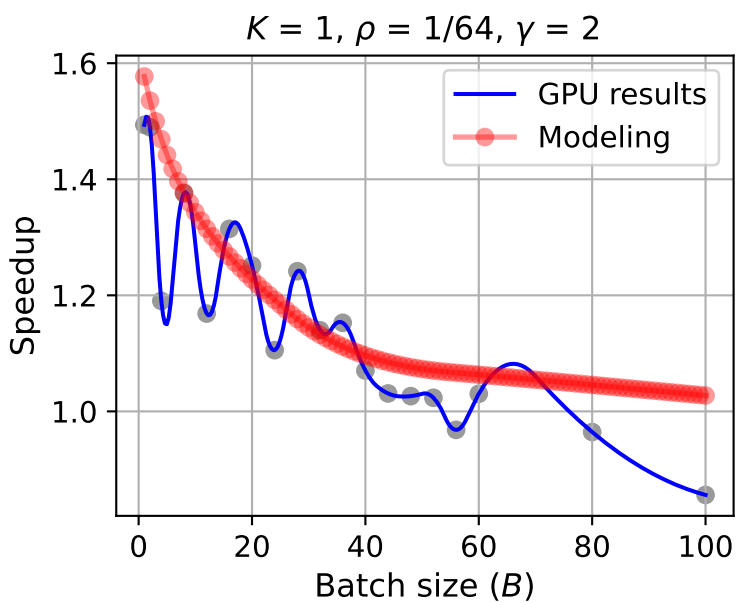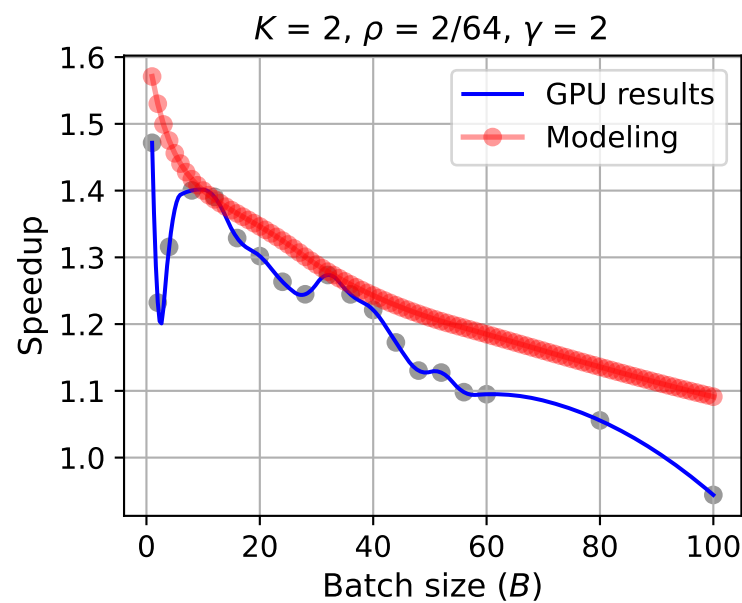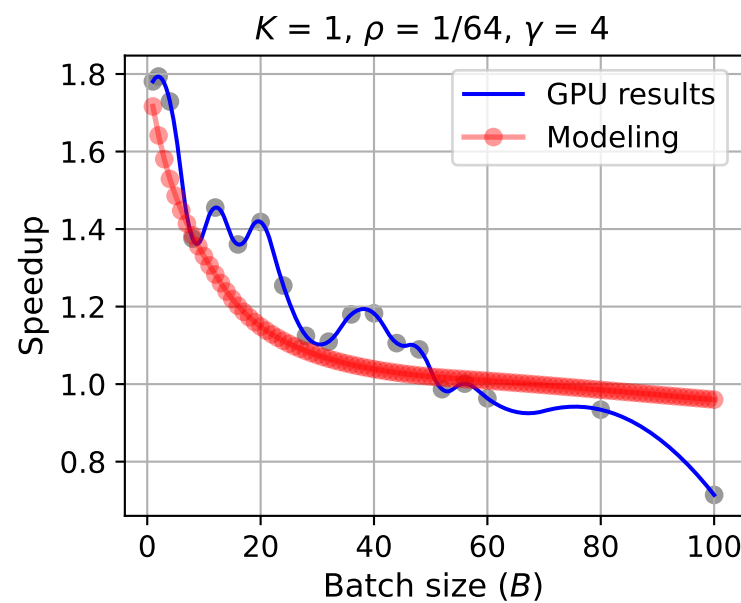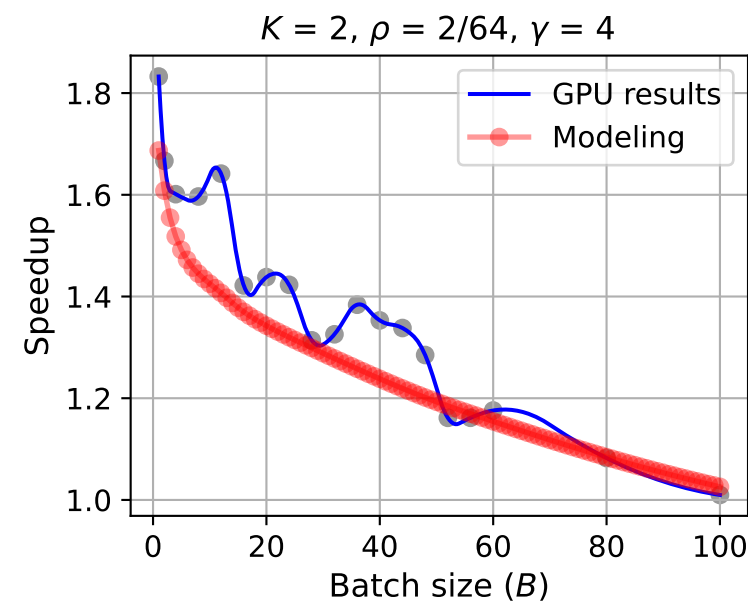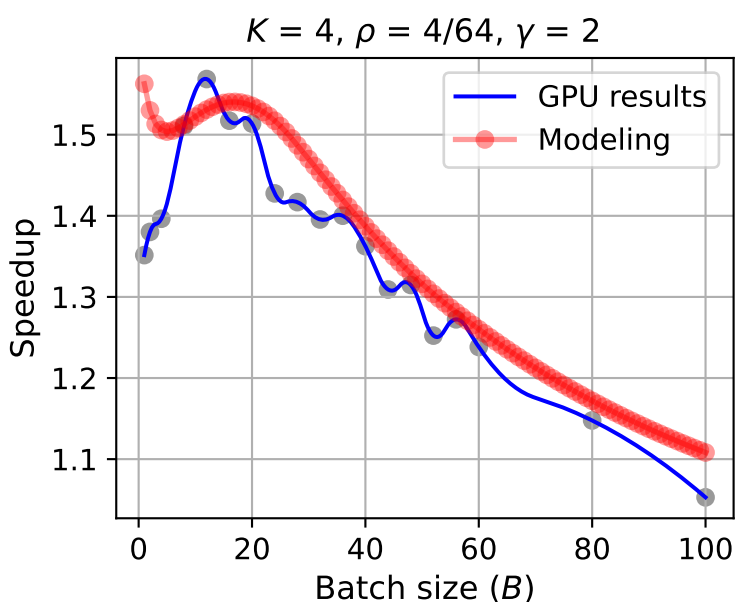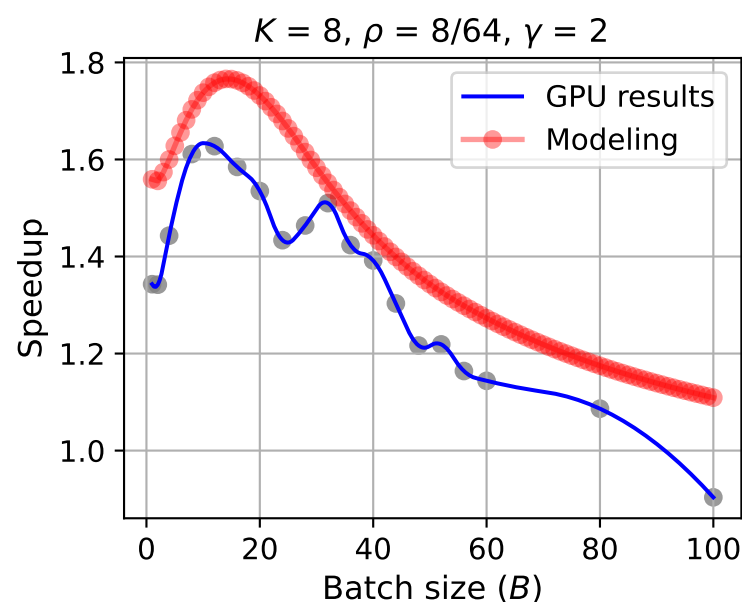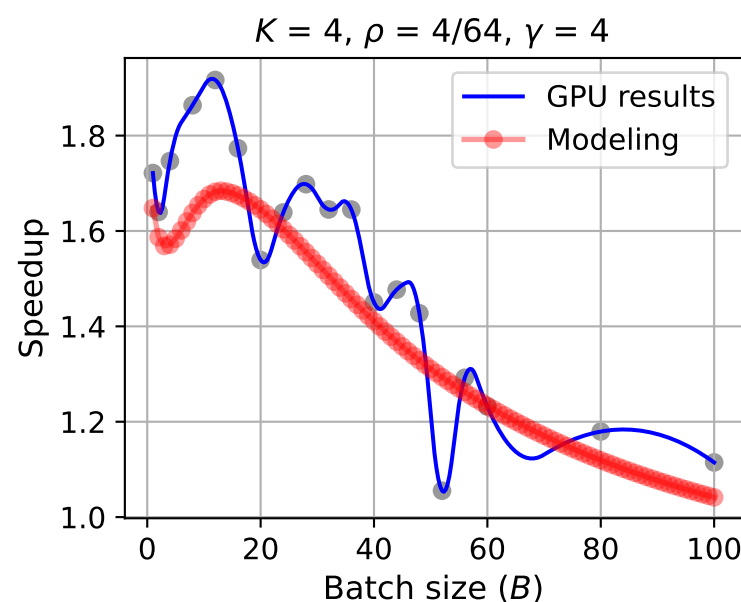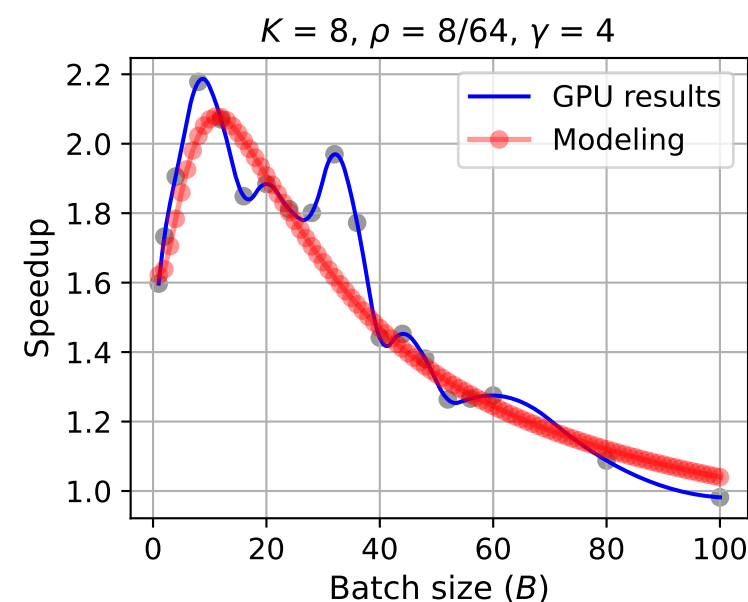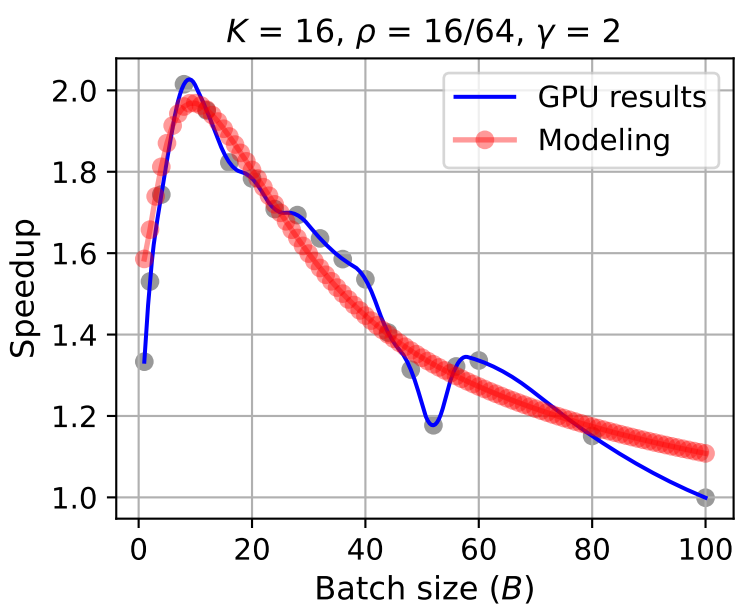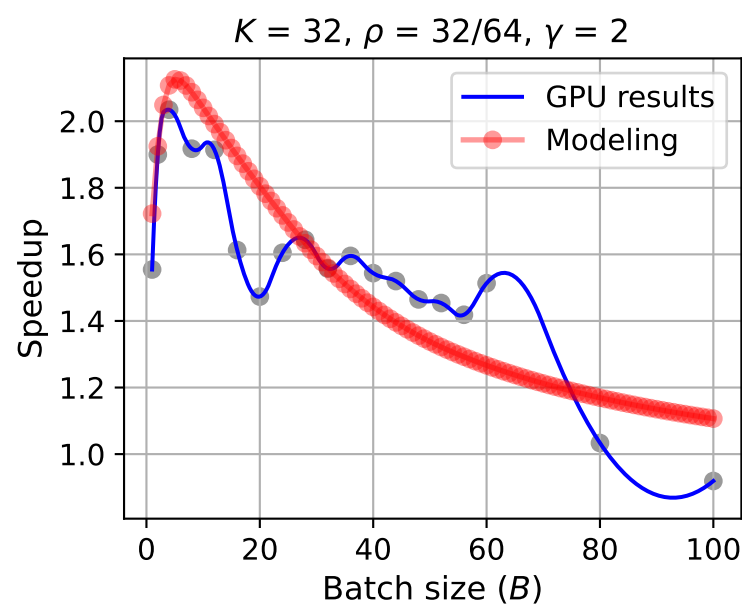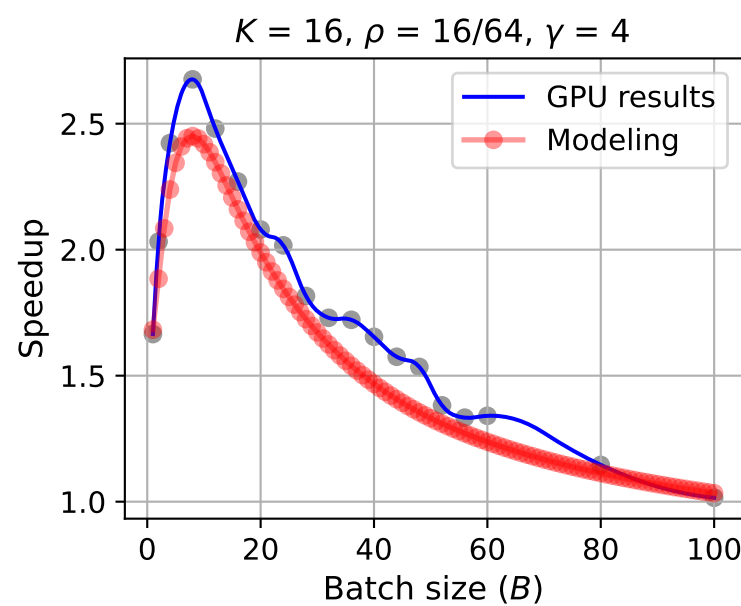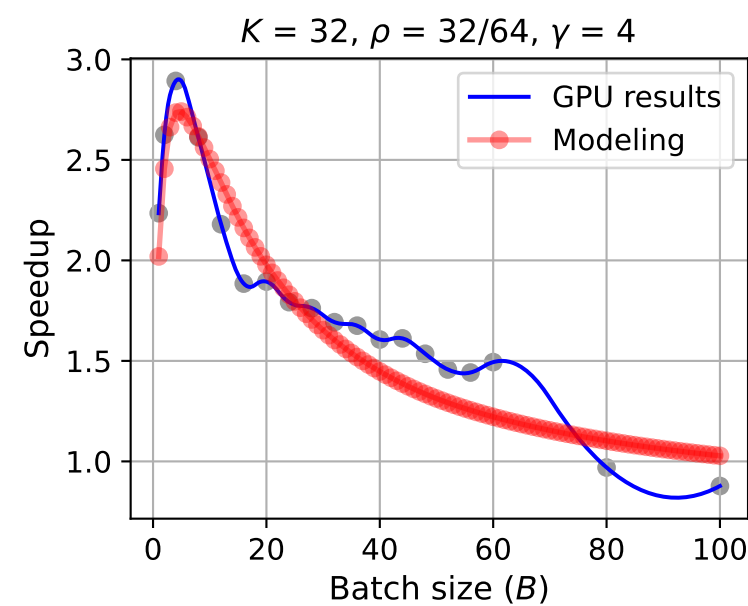

Supplement: supplementary_material [file fit_38_measurements.pdf › code/modeling/plot_example/appendix/fit_38_measurements.pdf]

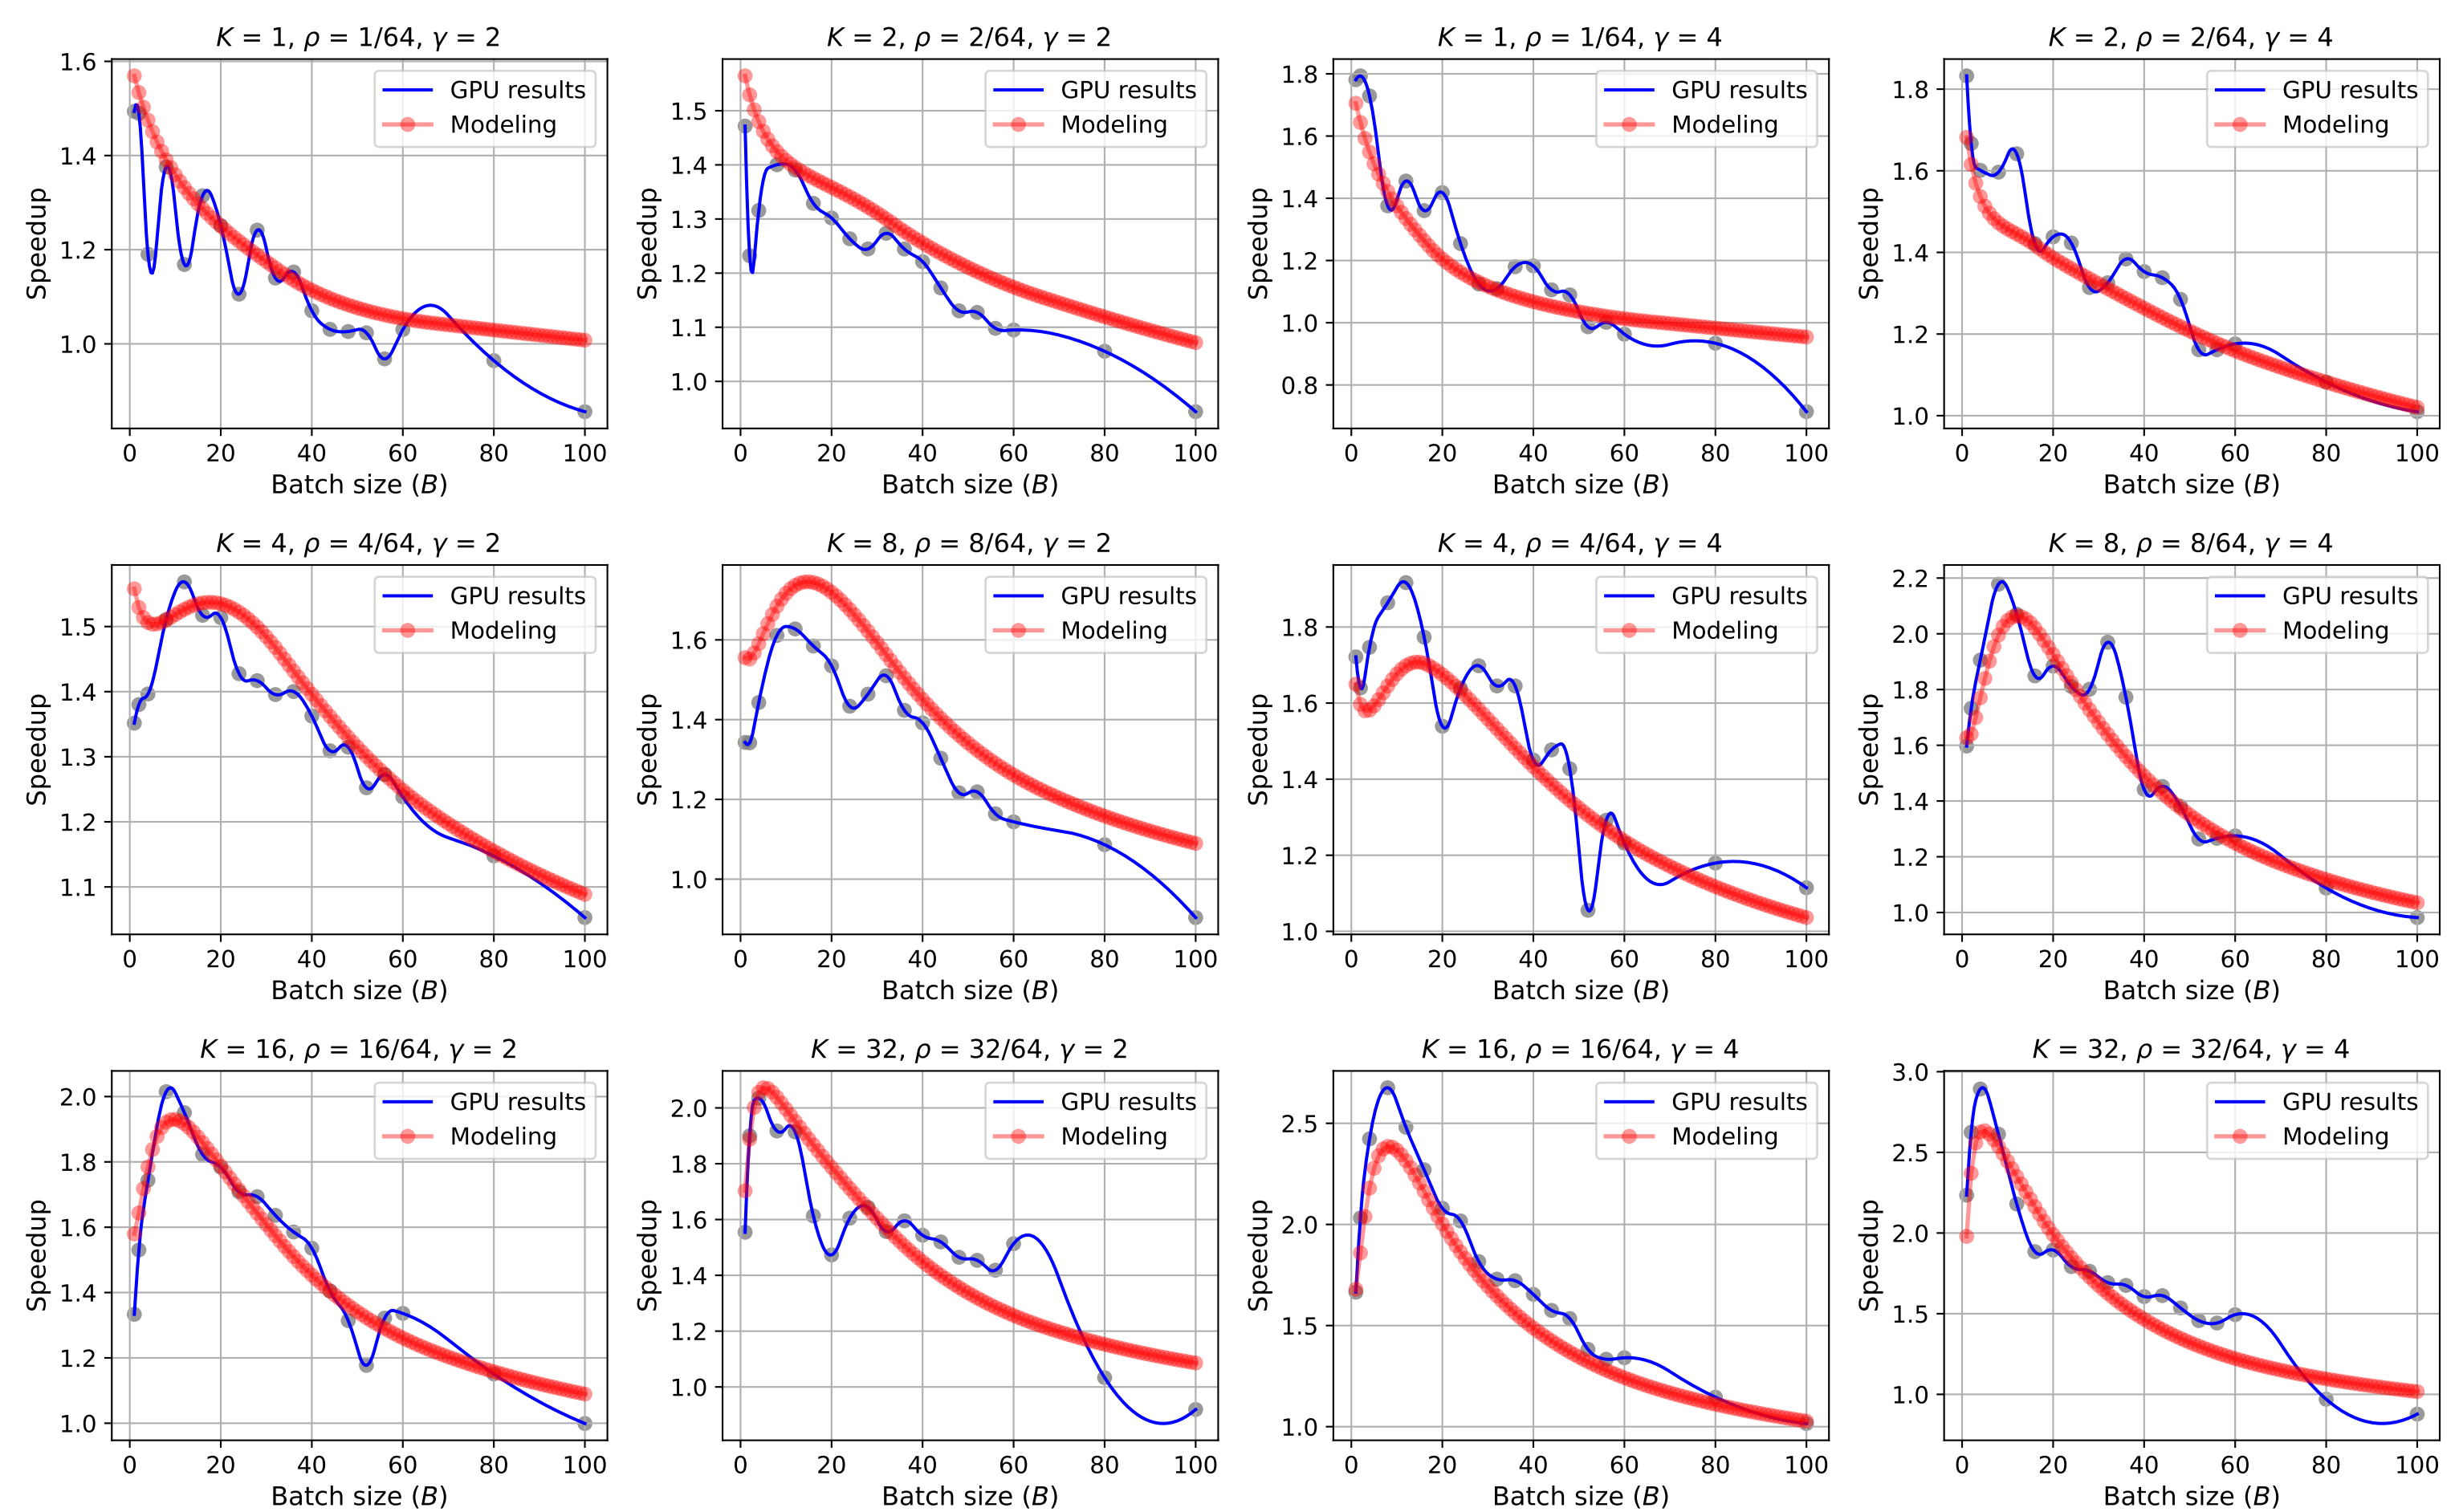

Supplement: supplementary_material [file fit_76_measurements.pdf › code/modeling/plot_example/appendix/fit_76_measurements.pdf]

A800, humaneval, temp=0,  $\gamma = 4$

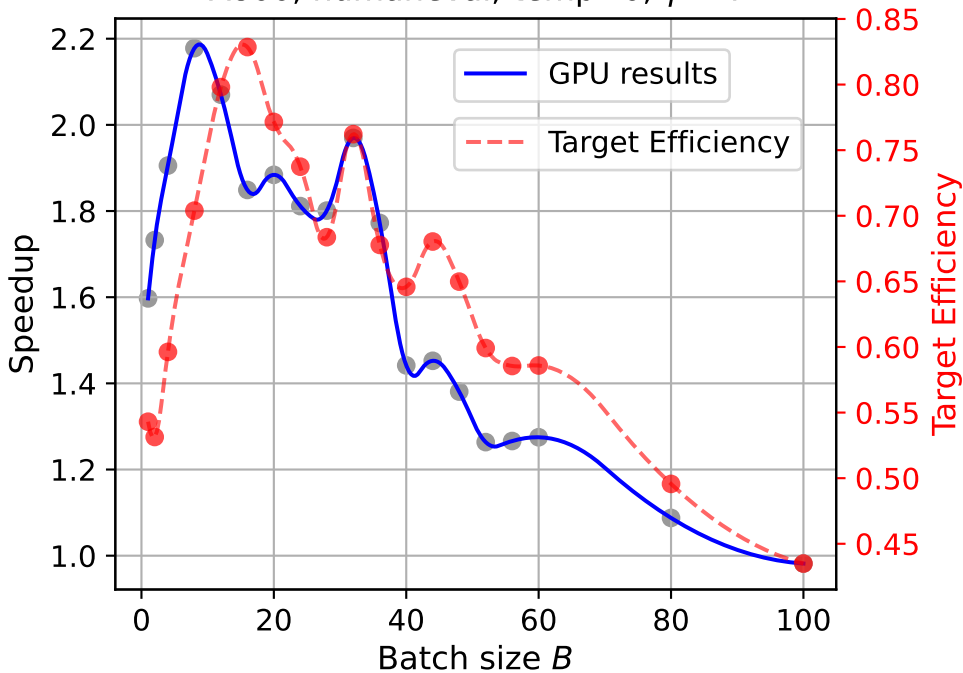

Supplement: supplementary_material [file real_vs_metric_A800.pdf › code/moe/plot_example/real_vs_metric_A800.pdf]

H800, humaneval, temp=0,  $\gamma = 4$

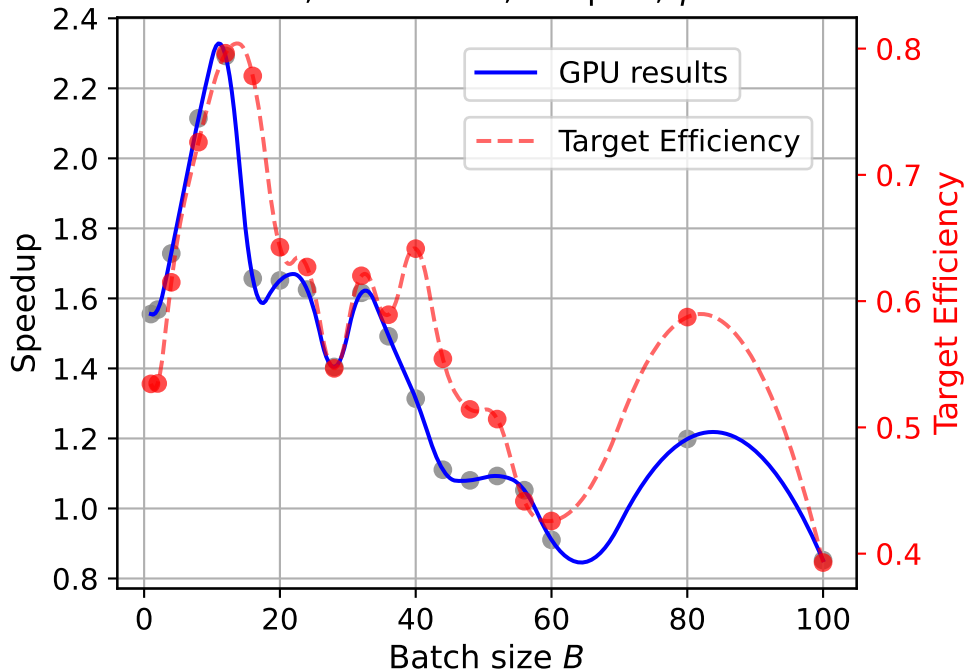

Supplement: supplementary_material [file real_vs_metric_H800.pdf › code/moe/plot_example/real_vs_metric_H800.pdf]
